1 High retention of genomic variation and fitness-related traits in the effective  
2 population of reintroduced wolves in Yellowstone National Park

3

4 Bridgett M. vonHoldt<sup>1,\*</sup>, Alexandra L. DeCandia<sup>1,2</sup>, Kira A. Cassidy<sup>3</sup>, Erin E.  
5 Stahler<sup>3</sup>, Janet S. Sinsheimer<sup>4,5</sup>, Douglas W. Smith<sup>3</sup>, Daniel R. Stahler<sup>3</sup>

6

7 <sup>1</sup>Department of Ecology and Evolutionary Biology, Princeton University,  
8 Princeton NJ USA; <sup>2</sup>Smithsonian Conservation Biology Institute, National  
9 Zoological Park, Washington, DC USA; <sup>3</sup>Yellowstone National Park,  
10 Gardiner, WY USA; <sup>4</sup>Department of Biostatistics, Fielding School of Public  
11 Health, UCLA, Los Angeles, CA USA; <sup>5</sup>Departments of Human Genetics and  
12 Computational Medicine, David Geffen School of Medicine, UCLA, Los  
13 Angeles, CA USA

14

15 Word Count: 5 582

16

17 \*Corresponding author: Bridgett M. vonHoldt, [vonholdt@princeton.edu](mailto:vonholdt@princeton.edu)

18

19 **Abstract**

20 Cooperatively breeding species exhibit numerous strategies to avoid mating  
21 with close relatives, inherently reducing effective population size. For species  
22 of management concern, accurate estimates of inbreeding and trait depression  
23 are crucial for the species' future. We utilized genomic and pedigree data for  
24 Yellowstone National Park gray wolves to investigate the contributions of  
25 foundation stock lineages, genetic architecture of the effective population, and  
26 putative fitness consequences of inbreeding. Our dataset spans 25 years and  
27 seven generations since reintroduction, encompassing 152 nuclear families and  
28 329 litters. We found over 87% of the pedigree foundation genomes persisted  
29 and report influxes of allelic diversity from two translocated wolves from a  
30 divergent source in Montana. As expected for group-living species, mean  
31 kinship significantly increased over time, although we found high retention of  
32 genetic variation. Strikingly, the effective population carried a significantly  
33 lower level of genome-wide inbreeding coefficients and autozygosity with  
34 shorter decays for linkage disequilibrium relative to the non-breeding  
35 population. Lifespan and heterozygosity were higher in the effective  
36 population, although individuals who had their first litter at an older age also  
37 had higher inbreeding coefficients. Our findings highlight genetic contributions  
38 to fitness, and the importance of effective population size and gene flow to

39 counteract loss of genetic variation in a wild, free-ranging social carnivore. It  
40 is crucial for managers to mitigate factors that significantly reduce effective  
41 population size and genetic connectivity, which supports the dispersion of  
42 genetic variation that aids in rapid evolutionary responses to environmental  
43 challenges.  
44

45 **Introduction**

46 Territorial, cooperatively-breeding species can exhibit a diversity of breeding  
47 strategies (e.g. monogamy, polygamy, polyandry) and reproductive skew  
48 (Keller and Reeve 1994; Clutton-Brock 2016). Yet regardless of these patterns,  
49 access to reproduction is restricted and effective population size ( $N_e$ ) is  
50 reduced (Jennions and Macdonald 1994; Frankham 1995; Komdeur and  
51 Deerenberg 1997). Estimates of  $N_e$  provide critical information during the  
52 application and interpretation of evolutionary and population genetic theory  
53 (Wright 1931, 1969; Crow and Kimura 1970; Lanfear et al. 2014), as well as  
54 for wildlife management programs (Rowe and Beebee 2004). Species that have  
55 experienced either a natural population decline or bottleneck are expected to  
56 have a dramatically reduced census and effective size, and an increased  
57 probability of inbreeding and genetic identity by descent or autozygosity  
58 (Hedrick and Kalinowski 2000; Charlesworth and Willis 2009). Consequently,  
59 inbreeding can dramatically impact  $N_e$  estimates through increased genetic  
60 correlations and decreased frequency of heterozygotes (Ellegren 1999; Wang  
61 et al. 2016). Viability is then threatened by inbreeding or trait depression, the  
62 negative fitness consequence expected in inbred offspring (Lynch and Walsh  
63 1998; Charlesworth and Willis 2009; Hedrick and Garcia-Dorado 2016).  
64 Inbreeding depression is often measured in fitness-related traits of life history

65 (e.g. fecundity, survival, morphological measurements) and often only in  
66 captive populations (Hedrick and Kalinowski 2000). Measuring autozygosity  
67 further provides an assessment of the full effect of deleterious alleles, as  
68 individuals that carry greater levels of autozygosity are expected to exhibit  
69 decreased fitness (Charlesworth and Willis 2009).

70         Although there has been much attention paid to inbreeding avoidance  
71 and trait depression in captive breeding programs from pedigree estimates  
72 (Ralls et al. 1988; Laikre and Ryman 1991; Laikre et al. 1993; Kalinowski et  
73 al. 2000; Kalinowski and Hedrick 2001; Jiménez-Mena et al. 2016), much less  
74 is known about the genetic basis of depression in wild populations, although it  
75 is expected to exist (Lacy 1997; Keller and Waller 2002; Curik et al. 2017).  
76 Further, pedigrees that are unbalanced, incorrect, or incomplete can lead to  
77 errors in estimating inbreeding coefficients and trait depression (Curik et al.  
78 2017). One critical aspect of pedigree-based errors is the assumption that  
79 pedigree founders are unrelated. Genome data now provide an opportunity to  
80 directly and accurately measure autozygosity, which quantifies the fraction of  
81 the genome that is contained within long stretches of homozygosity delineated  
82 along chromosomes ( $F_{ROH}$ ; McQuillan et al. 2008). Keller et al. (2011) also  
83 showed that  $F_{ROH}$  outperformed inbreeding estimates derived from pedigree  
84 data.

85           We studied the dynamic landscape of inbreeding and life-history traits  
86 in a pedigreed population of gray wolves (*Canis lupus*). As a cooperatively-  
87 breeding species, wolf populations are subdivided with limited access to  
88 reproduction that is reinforced by a social hierarchy and social rank-related  
89 stress reflected in glucocorticoid levels (Sands and Creel 2004; vonHoldt et al.  
90 2008). Several studies of small, isolated, bottlenecked or captive gray wolf  
91 populations across their Holarctic range have found genetic evidence of high  
92 inbreeding levels with a corresponding reduction in fitness and related  
93 population genetic health metrics. Two primary examples of such isolated  
94 island populations of wolves are those inhabiting Isle Royale in Lake Superior  
95 and Scandinavia (Laikre and Ryman 1991, 1993; Ellegren 1999; Flagstad et al.  
96 2003; Liberg et al. 2005; Raikkonen et al. 2009, 2013; Adams et al. 2011;  
97 Hedrick et al. 2014; Akesson et al. 2016, 2021; Robinson et al. 2019).

98           Specific to the wolves inhabiting the contiguous United States,  
99 effective government wildlife control programs eradicated nearly all gray  
100 wolves by the early 1930s (except in Minnesota; Fritts et al. 1997). Over five  
101 decades later, substantial support developed to establish a reintroduction plan  
102 for gray wolf restoration to the Rocky Mountains (Fritts et al. 1997). During  
103 the winters of 1995 and 1996, the US Fish and Wildlife Service released 35  
104 wolves in central Idaho, and in a joint effort with the National Park Service,

105 released 31 wolves in Yellowstone National Park (YNP). Additionally, there  
106 was the translocation of 10 wolf pups from the Sawtooth pack in northwestern  
107 Montana to YNP where they were released in 1997. Foundation stock (a.k.a.  
108 YNP founders) were captured from two source locations in western Canada,  
109 and vonHoldt et al. (2008) utilized 26 microsatellites to provide valuable  
110 genetic insights with respect to their relatedness and population genetic health  
111 during the first decade of recovery. It was reported that YNP founder breeding  
112 pairs were unrelated with near absolute inbreeding avoidance despite living in  
113 groups of related individuals. Yet, given the resolution limits of microsatellite  
114 data for investigating genomic architecture, little is known about the nature of  
115 genetic variation or chromosomal regions that are identical by descent (IBD).

116 Building upon the recent release of their updated pedigree constructed  
117 using genome-wide SNP data (vonHoldt et al. 2020), we explore here the  
118 genetics of YNP founders' lineages, demography, genomic contributions,  
119 inbreeding, and consequences thereof in YNP gray wolves during their 25  
120 years post-reintroduction. We assessed pedigree- and marker-based aspects of  
121 the wolf population with the unique opportunity to integrate life-history fitness  
122 correlates with respect to reproduction. With the pedigree reconstructed  
123 utilizing genomic data, these two perspectives have provided new details

124 regarding the genetic viability, reproduction, and recovery status of this social  
125 carnivore.

126

## 127 **Materials and Methods**

### 128 *Yellowstone National Park's reintroduced wolf population*

129 We analyzed 474 YNP gray wolves with pedigree and 391 with  
130 genome-wide SNP data derived from blood and tissue samples collected  
131 between 1995 and 2020 (see below). After reintroduction, the YNP population  
132 rapidly expanded, reaching a high of 174 wolves in 2003. However, the  
133 population stabilized over the last decade (Smith et al. 2020), averaging 97.9  
134 ( $\pm 3.9$  SE) at the year-end official census count. For this study, the original 31  
135 wolves translocated to YNP and the parents of the 10 translocated orphaned  
136 pups were designated as *YNP founders*. This is not to be confused with the  
137 animals at the foundation of the pedigree, known as the *pedigree founders*,  
138 which included two wolves sampled in Canada who were not translocated but  
139 known to be related to YNP wolves. The original and updated genealogy for  
140 this population confirmed close kinships (e.g. parent/offspring of full-siblings)  
141 and genetic similarities among a subset of the YNP founders (vonHoldt et al.  
142 2008, 2020). These kinship ties were expected given the nature of the wild  
143 capture methods and release. Several individuals were captured together, likely



144 representing a pack or a subset thereof. These relationships are reflected by  
145 increased allele sharing in the genetic-based analysis below, while the  
146 pedigree-based analysis incorporated these known relationships. These  
147 relationships are critical to account for as most treatments of founders assume  
148 they are unrelated (i.e. their kinship  $f_{xy}$  and inbreeding coefficients  $F$  are set to  
149 0; Jiménez-Mena et al. 2016).

150

### 151 *Pedigree-based analysis*

152       We updated the full YNP wolf pedigree by adding three new  
153 individuals indicated in Supplemental Table S1 and used the same genomic  
154 preparation and analytical methods described by vonHoldt et al. (2020).  
155 Briefly, we constructed a parentage-informative dataset of 736 SNPs through  
156 strict filtering in *PLINK v1.9* (Chang et al. 2015) with parameter settings  
157 recommended for pedigree reconstruction (Huisman 2017): Hardy-Weinberg  
158 equilibrium (HWE) (--hwe 0.001), minor allele frequency (MAF) (--maf 0.45),  
159 and statistical linkage disequilibrium (LD) (--indep-pairwise 50 5 0.2). We  
160 calculated pairwise relatedness coefficients ( $r$ ) using the *coancestry* function  
161 within the R v3.6.0 (2019) package *related* and implemented the dyadic  
162 likelihood estimator (dyadml=1; Milligan 2003) with allowance for inbreeding  
163 (allow.inbreeding=TRUE) (Pew et al. 2015). We then used these estimates

164 alongside observation data and likely parent-offspring (P-O) pairs assigned by  
165 the R v3.6.0 package *sequoia* (Huisman 2017) to update the full YNP wolf  
166 pedigree to include 871 P-O pairs among 474 wolves (n, females=226,  
167 males=239, unknown=9; Table S1) (vonHoldt et al. 2020). Wolves that lacked  
168 genetically-confirmed parents or offspring were excluded from the pedigree  
169 analysis. For individuals where the likely birthday was a range of years, we  
170 assigned it the earliest birth year. We completed several of the described  
171 methods for the full pedigreed population, as well as annually between 1995  
172 and 2020.

173         We used *PedScope*© v.2.4.01, a proprietary program used for animal  
174 population management and breeding recommendations, to perform pedigree-  
175 based analyses. The pedigree contained 26 pedigree founders, defined as  
176 individuals where no parents are included in the pedigree (Table S1).  
177 Correlations were assessed using the product moment correlation coefficient  
178 ( $r$ ). We estimated several measures of gene diversity in the pedigreed  
179 population. We estimated the number of founder equivalents ( $f_e$ ) and founder  
180 genome equivalents ( $f_g$ ). The former measured gene diversity in a specified set  
181 of the pedigree (*e.g.* pedigree founders, annual, or entire) and represents the  
182 number of equally contributing founders expected to produce the observed  
183 level of genetic diversity in the specified population. The latter is a related

184 metric that accounts for drift, where  $fg$  represents an estimate that incorporates  
185 random loss of alleles. Further, we estimated the number of effective ancestors  
186 ( $fa$ ) and identified influential ancestors as those with the greatest contributions  
187 towards  $fa$  using an algorithm developed by Boichard et al. (1997). Estimates  
188 of  $fa$  are similar to that of  $fe$  but account for bottlenecks in the pedigree.

189         We surveyed genome uniqueness ( $GU$ ) defined as the animal's  
190 likelihood that it carries pedigree founder alleles not present in another  
191 individual in the pedigree. We also estimated mean kinship ( $MK$ ), Wright's  
192 pedigree-based inbreeding coefficient ( $F$ ), and Ballou's direct method for  
193 estimating ancestral inbreeding coefficient. In a pedigree-based approach,  
194 pairwise kinship values describe the probability that two alleles shared are  
195 IBD, a measure also estimated by the pedigreed population's inbreeding  
196 coefficient  $F$ . We obtained the pairwise additive genetic relationship matrix  
197 ("A" matrix) to also assess pairwise relatedness. Differences in pedigree  
198 metrics were assessed using a 1-way ANOVA in R v3.6.0.

199         We counted the number of litters per individual as the total number of  
200 years a specific mating pair reproduced and included only offspring where  
201 birth year was known. We also included litter counts if only one parent was  
202 known. We used the  $\log_{10}$  of the number of genetic litters as a proxy for  
203 fitness, surveyed as a function of inbreeding coefficients, where the slope of

204 the fitted line is inferred as the inbreeding load ( $-B$ ) (Keller and Waller 2002).  
205 We further used the pedigree to estimate the total number of lethal equivalents  
206 (LE) per diploid genome ( $2B$ ). The inbreeding load is often defined as the  
207 reduction in survival expected in a completely homozygous individual. We  
208 then estimated the expected depression in fitness ( $\delta$ ) following  $\delta=1-e^{-B^*F}$ ,  
209 where  $B$  is the estimated number of lethal equivalents per gamete and  $F$  is the  
210 inbreeding coefficient.

211

### 212 *Genome-wide SNP genotype data*

213 Although the pedigree relationships are valuable, we utilized a marker-  
214 based genomics approach to explore the impact of pedigree structure on  
215 genomic variation and life-history related traits (Kardos et al. 2015). A subset  
216 of wolves in the pedigree were excluded from the genetic analyses due to low  
217 sequence coverage or lack of a genetic sample (*i.e.* only observation data  
218 supported their pedigree information). As such, the pedigree contains more  
219 individuals than analyzed with RADseq data. Further, we included  
220 observational data regarding parentage and reproduction. Such an exception  
221 was made when reproduction was observed but a genetic sample was  
222 unavailable. We analyzed 56 576 SNP loci (referred to as 56K) genotyped  
223 across 391 gray wolves (n, females=193, males=195, unknown=3), which were

224 previously collected using a modified restriction-site associated DNA  
225 sequencing (RADseq) protocol by Ali et al. (2016) and mapped to the  
226 reference dog genome Canfam3.1 (vonHoldt et al. 2020). These public data  
227 were previously filtered to exclude individuals with >20% missing data and  
228 sites with >10% per-site missing data, MAF<1%, or significant deviation from  
229 HWE ( $p<0.0001$ ), leading to a final genotyping rate of 96.4%. We estimated  
230 LD decay using the `--r2` flag across 391 YNP wolves genotyped for 56K SNPs.  
231 We further removed SNPs with a genotype correlation of  $r^2>0.5$  using the `--`  
232 `indep-pairwise 50 5 0.5` flag to construct a pruned set of 24,235 statistically  
233 unlinked SNPs (referred to as 24K). Individual wolves with confirmed  
234 offspring via genetics or observation were categorized as “breeding”  
235 individuals ( $n=152$ ), while wolves lacking offspring were considered “non-  
236 breeding” individuals ( $n=235$ ), with four wolves of unknown breeding status  
237 (Table S2). We also completed several of the described methods for the full  
238 pedigreed population overall as well as annually and censored, between 1995  
239 and 2018, with the pruned SNP set. Differences in annual estimates were  
240 assessed using a 1-way ANOVA in R. We estimated standard observed and  
241 expected heterozygosity ( $H_O$  and  $H_E$ , respectively) in *PLINK* with the `--hardy`  
242 and `--het` flags.

243 We also obtained the predicted impact and consequence of each allele  
244 from *Variant Effect Predictor* (VEP) (McLaren et al. 2016). Based on VEP  
245 impact annotations, we grouped the 17 loci with “*high*” predicted impact and  
246 381 loci with “*moderate*” impact into a category (n=398 loci) inferred to  
247 negatively impact the individual fitness. This category was further detailed as  
248 the “*high*” impact loci were annotated as the gain/loss of a stop, loss of a start,  
249 or a splice acceptor/donor, while loci with “*moderate*” impact were missense  
250 variants and splice regions. We also grouped 844 loci annotated as “*low*”  
251 impact and 29 213 loci with a “*modifier*” impact in a category inferred to  
252 unlikely impact fitness (n=30 057 loci).

253

#### 254 *Estimating the inbreeding coefficient from genotype data*

255 We estimated individual inbreeding coefficients (F) from the pruned  
256 SNP set and runs of homozygosity (ROH) with the R v3.6.0 function  
257 *detectRUNS* (Biscarini et al. 2018) as:

$$258 \quad F_{ROH} = \frac{\sum L_{ROH}}{L_{genome}}$$

259 where  $L_{ROH}$  is the summed length of all ROHs detected in an individual and  
260  $L_{genome}$  is the length of the genome that is used. As RADseq data are inherently  
261 clustered as sequence stacks across the genome at restriction enzyme cut sites,  
262 we used the consecutive window-free option for detecting homozygous and

263 heterozygous tracks (Marras et al. 2015). Tracks were detected by a minimum  
264 of 10 SNPs in a track of at least 10 000 nucleotides with a maximum gap of  
265  $10^6$  nucleotides between SNPs, and allowed for a maximum of a single  
266 opposite or missing genotype in the track. We further annotated each ROH  
267 with respect to their composition of alleles with either a functional impact or  
268 consequence (see VEP methods above) using the *intersectBed* function of  
269 *Bedtools* v2.28.0 (Quinlan and Hall 2010).

270

### 271 *Modeling reproduction, life history, and genetic parameters*

272 We examined the age at first litter (*Age\_first\_litter*) using Cox  
273 proportional hazards regression for survival (*survival* version 3.2-11) with time  
274 (in years) to the earliest of three events first litter, death or last documented  
275 observation. Animals who died or were lost to observation before breeding  
276 were considered right censored data in the analysis. We used the exact method  
277 to deal with ties when two or more animals had the same survival times. We  
278 standardized the potential predictors (observed heterozygosity,  $F_{ROH}$  and VEP  
279 consequence categories), and included sex and the first five principle  
280 components (PCs) as covariates in all analyses. We fit the following model  
281 structure:

282  $Fit=coxph(Surv(Age\_litter,Censoring)\sim Predictor,ties="exact",data)$

283 For the Cox proportional hazards regression analysis, although  $p$ -values are  
284 reported, we elected the best fit models through assessment of the Akaike  
285 information criterion (AIC).

286

## 287 **Results**

### 288 *Pedigree structure*

289 Using *Pedscope*©, the pedigree composed of 26 founders of the  
290 pedigree (individuals where no parents are found within the pedigree), 152  
291 nuclear families (individuals that share the same parents), and 319 litters.  
292 Compared to the census size of 41 YNP founder individuals, we inferred 19.92  
293 pedigree founder equivalents ( $fe$ ), 18.53 founder genome equivalents ( $fg$ ), and  
294 18.79 effective ancestors ( $fa$ ) in the pedigree analysis. There was a maximum  
295 ancestry depth of seven generations (Average $\pm$ s.d.=3.8 $\pm$ 1.6), with an average  
296 kinship (MK) of 3.2%. We restricted the founder analysis to the wolves  
297 translocated in years 1995 and 1996, which included the individuals  
298 translocated from the Sawtooth pack in northwestern Montana. We found that  
299 wolf 009F had the highest contribution as measured by the percent contribution  
300 in the current pedigree due to that individual ( $pC=12\%$ ; average=3.8%),  
301 followed by 005F with 9% to the full pedigree of 474 wolves, and then by their  
302 respective mates 010M and 004M both with 8% contributions each (Table 1).



303 Nearly all pedigree founders had  $\geq 87\%$  of their alleles retained in the total  
304 pedigree (Average $\pm$ s.d.= $88\%\pm 20\%$ ), with only three individuals at 50%  
305 retention (015M, 036F, and a Canada source wolf Y38 whose offspring were  
306 translocated to the Chief Joseph pack in YNP) (Table 1).

307 Average levels of founder genome uniqueness were low  
308 ( $GU=0.10\pm 0.3$ ), with only a single pedigree founder (036F) displaying  
309 absolute uniqueness ( $GU=1$ ), and four additional individuals with non-zero  
310 values (013M, 015M, 035M, Y53) indicating the likelihoods that alleles are  
311 not present in another individual in the pedigree (Table 1). A survey of the  
312 total pedigree also revealed 20 influential pedigree founders, similarly  
313 highlighting the largest marginal contributions by mated pair 009F (12%) and  
314 010M (8%), and mated pair 004M and 005F (8% and 9%, respectively) (Table  
315 2).

316 We found a significant increase in annual MK with decreasing size of  
317 the genotyped population analyzed ( $F_{(1,22)}=14.6$ ,  $p=0.0009$ ), an increase of  
318 genomic uniqueness over time ( $F=9.6$ ,  $p=0.0053$ ), an increase in founder  
319 equivalents ( $F=38.4$ ,  $p=3.063\times 10^{-6}$ ), and a decrease in the number of founder  
320 genome equivalents over time ( $F=15.8$ ,  $p=0.0006$ ) (Table 3). The number of  
321 effective founders did not significantly change over time ( $F=0.7$ ,  $p=0.395$ )  
322 (Table 3).

323           When we excluded observations of 0 litters, 153 observations remained  
324 with low levels of inbreeding coefficients (average  $F=0.009\pm 0.03$ ; range=0.0-  
325 0.25) and was negatively correlated to the number of litters (Pearson  $r=-0.076$ ,  
326  $p=0.35$ ) (Fig. 1A). From this, we estimated the inbreeding load as the slope of  
327 the trendline between  $\log_{10}$  litter number and inbreeding coefficient ( $y=-$   
328  $0.595x+0.292$ ,  $-B=0.595$ ), and thus  $2B=0.595$  lethal equivalents (LE) in a  
329 diploid genome. Following, we estimated fitness ( $\delta$ ) is expected to be  
330 depressed in 14% of progeny from a mating of first-degree relatives ( $F=0.25$ ).  
331

### 332 *Lower inbreeding coefficients in the effective population*

333           We obtained genome-wide SNP-based estimations for linkage,  
334 heterozygosity, and inbreeding for 391 Yellowstone gray wolves, 387 of which  
335 have known breeding status within the study period of 1995-2018 (Table S2).  
336 Linkage disequilibrium in the total YNP wolf population extended for an  
337 average of 150Kb before decaying below  $r^2=0.5$ , with a similar length of LD  
338 decay found in the breeding population (230Kb) and substantially longer LD  
339 decay in non-breeding wolves (750Kb) (Fig 1B). We found no significant  
340 differences in heterozygosity between wolves with a confirmed breeding status  
341 and non-breeding wolves across the 56K SNP genotypes (Average $\pm$ s.d.  $H_0$ :  
342 breeding= $0.792\pm 0.02$ , non-breeding= $0.794\pm 0.02$ , 1-tailed  $t$ -test of equal

343 variance  $p=0.0917$ ). However, the breeding population had significantly lower  
344 levels of inbreeding estimates than non-breeding individuals ( $F_{ROH}$ :  
345 breeding= $0.376\pm 0.06$ , non-breeding= $0.387\pm 0.06$ ,  $p=0.0462$ ) (Fig. 1C). We  
346 found statistical evidence for enrichment of longer ROH blocks in non-  
347 breeding individuals relative to the effective population (mean= $1,311,428\text{bp}$   
348 and  $1,347,336\text{bp}$ , respectively; 1-tailed Mann-Whitney  $U=7868\times 10^9$ ,  
349  $p=0.8.854\times 10^{-5}$ ) (Fig. 1D).

350         We observed stable annual heterozygosity estimates that were not  
351 significantly different between breeding and non-breeding wolves for 21 of the  
352 24 years surveyed, likely due to small intra-annual genetic sample size relative  
353 to the census size (Table 4). During three years (2011-2013), non-breeding  
354 wolves carried significantly higher observed heterozygosity than the effective  
355 population ( $p\sim 0.05$ ), although this trend can be noted in nearly every year  
356 surveyed and should be interpreted with caution given the small annual sample  
357 sizes. A similar but opposite trend was noted for inbreeding coefficients  
358 estimated from  $F_{ROH}$ , where non-breeding wolves had a significantly higher  
359 inbreeding coefficient than breeding wolves for a single year (2012) ( $F=5.64$ ,  
360  $p=0.0210$ ) (Table 4).

361

362 *Individuals with higher autozygosity estimates are older at first litter*

363           We restricted the dataset to explore fitness and genetic data for 387  
364 pedigreed wolves with sufficient life history information (known years of birth  
365 and known years of reproduction, death or last observation). We found that  
366 lifespan (average breeding=6.1 and non-breeding=2.1 years, 1-tailed t-test  
367  $p=9.31 \times 10^{-43}$ ) was on average higher in the effective population concomitant  
368 with lower inbreeding coefficients (average breeding=0.37 and non-  
369 breeding=0.38 years, 1-tailed t-test  $p=0.0466$ ), and that breeding wolves were  
370 on average  $2.9 \pm 1.2$  years old (males= $3.2 \pm 1.3$ , females= $2.7 \pm 1.1$ ; 1-tailed t-test  
371  $p=0.0086$ ) at the time of their first litter (Figs. 2A,B). However, several life-  
372 history and genetic traits show strong correlations, with positive correlations  
373 noted between lifespan, age at first litter, and number of litters while  
374 inbreeding coefficients were negatively correlated (Fig. 2C).

375           We further explored the relationship of similar genetic parameters with  
376 respect to a wolf's age at first litter using Cox proportional hazards survival  
377 analysis. In all analyses we included sex as a covariate along with the first five  
378 PCs from SNPs covering the genome to account for the relatedness; similar  
379 results were obtained without these covariates (results not shown). There were  
380 139 animals with known ages at their first litter and 235 non-breeding animals  
381 with known age at death or last observation for a total of 374 animals with PCs  
382 and phenotype data used in this analysis. Individuals who had their first litter at

383 an older age had higher inbreeding coefficients (Fig. 2D). We found that a  
384 higher inbreeding coefficient significantly reduced the Cox proportional hazard  
385 and was associated with later reproduction. Thus,  $F_{ROH}$  was a significant  
386 predictor of age at first litter (Log hazard coefficient=-0.2406,  $p=0.0203$  Table  
387 5). Sex was also significant, with males having a later age to their mate's first  
388 litter than females (Log hazard coefficient=-0.5674,  $p=0.0012$  Table 5).

389

## 390 **Discussion**

391 The reintroduced gray wolves of Yellowstone National Park are unique  
392 in that they are observed every single year, with life events documented and  
393 supported by a wealth of molecular data. Despite the rising accessibility of  
394 genome sequencing, Yellowstone wolves stand among only a few other  
395 systems with similar multidimensional datasets that merge static, dynamic, and  
396 molecular perspectives (Stahler et al. 2020). We explored this interface by  
397 conducting a pedigree- and marker-based assessment of genetic variation over  
398 time within the effective population and modeled fitness-related traits. The  
399 pedigree is large and complex, capturing seven generations since the  
400 reintroduction of gray wolves to the Rocky Mountains of the United States in  
401 1995 and 1996. Although Canadian founders were carefully selected and  
402 indeed have contributed to the genetic success of the population, equally

403 important was the translocation of gray wolf pups from northwest Montana in  
404 1997 that carried divergent genetics (vonHoldt et al. 2008, 2010). As two of  
405 these pups matured and assumed a social rank with reproductive access, this  
406 lineage continues to provide an influx of genetic variation distinct from the  
407 Canadian founders into YNP wolves through their descendants. This finding  
408 illustrates the critically positive impact that a few successful breeders have on  
409 gene flow into a population. Further, this is exemplary as a design for  
410 reintroduction programs to establish a genetically diverse founding population.

411         Given the known genealogy of this population, we identified a handful  
412 of founders that contributed a significant amount of kinship and genome  
413 uniqueness, with over 87% of the founders' genomes persisting in the  
414 pedigree. The remaining fraction was lost through random drift or emigration.  
415 As expected for group-living species, mean kinship significantly increased  
416 over time; however, this appears to be mitigated by the continued reproductive  
417 success of the translocated individuals from northwest Montana (now the Nez  
418 Perce lineage). Further, concordant with vonHoldt et al. (2008), mate choice  
419 and inbreeding avoidance also mitigates the degree to which mean kinship  
420 increased over time in the pedigree, which is expected to be significantly  
421 higher under random breeding alone. We found that the number of effective  
422 founders and genomic uniqueness increased over time; this positive

423 consequence is expected in a social species with structured mating, which can  
424 alleviate the potentially strong impacts of the reintroduction event which  
425 inevitably forces a population genetic bottleneck.

426         We utilized genome-wide SNP data to explore the distribution of  
427 genetic variation across the pedigree relative to time, reproduction, and fitness-  
428 related traits (e.g. litters, inbreeding). Overall, we document high retention of  
429 genetic variation over the 25 years since reintroduction. We found that the  
430 effective population of breeding wolves carried a significantly shorter  
431 distances at which LD decays. This is consistent with past findings that the  
432 YNP effective gray wolf population carried a higher mean allelic richness,  
433 which is expected to show more immediate changes than other allele diversity  
434 metrics like heterozygosity, than the census in nearly all years surveyed (1995-  
435 2015) (Cornuet and Luikart 1996; DeCandia et al. 2021).

436         We hypothesized that reproductive status reflected overall fitness and  
437 predicted that the effective population showed increased genetic variation,  
438 reduced autozygosity levels, and that fitness-related traits reduced in value  
439 with increasing autozygosity levels. Elevations of autozygosity levels indicate  
440 both a lack of genetic diversity and inflation of alleles that are identical by  
441 descent via inbreeding and are often associated with increased expression of  
442 recessive deleterious traits (Keller 2002; Charlesworth and Willis 2009).

443 Indeed, we found remarkably lower levels of autozygosity and inbreeding  
444 coefficients in the effective population relative to the non-breeding population.  
445 Such a trend is far more significant on overall inference of genetic health than  
446 levels of homozygosity. Our finding is in direct contrast to the gray wolf  
447 population in Isle Royale National Park (IRNP; Michigan, USA), which had  
448 persisted at exceedingly low numbers for over a decade with negative fitness  
449 and genome-wide consequences recently documented (Robinson et al. 2019).  
450 We do not suggest the genetic health of YNP wolves is similar to IRNP; rather,  
451 they represent differences along the complex gradient of interactions between  
452 effective population size, genetic isolation, and fitness.

453         The suggested traits impacted by autozygosity in YNP gray wolves  
454 were reflected in reproduction, a fitness consequence concordant with studies  
455 of IBD and complex diseases in humans (Ceballos et al. 2018; Pemberton et al.  
456 2018; Szpiech et al. 2013). After controlling for sex-specific differences in  
457 primiparity, individuals that are older at the time of their first litter carried  
458 higher levels of autozygosity, which was also positively associated with a  
459 significant reduction in the total number of litters for that individual. Proximate  
460 mechanisms for why these older individuals were unable to breed during  
461 previous years may be due to intra-pack composition (e.g. lower social status  
462 or no access to unrelated mates) or challenges with finding potential mates



463 through dispersal. Ultimately, individuals with higher levels of autozygosity  
464 that breed later in life may be losing out to higher quality competitors before  
465 eventually breeding, indicating a fitness cost. Sex-specific differences in age at  
466 first litter likely reflect differential breeding opportunities through male-biased  
467 dispersal and female natal philopatry documented in YNP wolves (Stahler et  
468 al. 2020; Smith et al. 2020).

469         Albeit such trait depression is difficult to acquire a large enough sample  
470 size for a well-powered study in natural populations, especially those with  
471 longer generation times, similar trends have been reported in other systems  
472 (Keller and Waller 2002). Nielsen et al. (2012) utilized a long-term pedigree-  
473 based design for meerkats (*Suricata suricatta*), a cooperative and group-living  
474 species, and found that increased inbreeding coefficients were associated with  
475 negative morphologic consequences for pups with higher inbreeding  
476 coefficients. Increased pathogen load was found in Soay sheep (*Ovis aries*) in  
477 sheep with reduced genetic diversity (Coltman et al. 1999) and depressed  
478 fitness across developmental stages for the endangered red-cockaded  
479 woodpecker (*Picoides borealis*) (Daniels and Walters 2000). We also recently  
480 found similar trends for the YNP wolves whereas reductions in genome-wide  
481 diversity estimates are associated with increased disease severity with respect  
482 to sarcoptic mange infections (DeCandia et al. 2021). While YNP wolves

483 overall are genetically diverse, we detected reproduction consequences  
484 associated with moderate increases in autozygosity as a result of reduced  
485 genetic variation. Similar patterns of reproductive consequences were found  
486 with maternal inbreeding levels in red deer (*Cervus elaphus*) being correlated  
487 with reduced offspring survival, further suggesting that depression of fitness  
488 traits in adult individuals is likely to be more accurately estimated from  
489 marker-based data (Huisman et al. 2016). Chu and colleagues (2019) reported  
490 a negative correlation between fecundity and autozygosity in a longitudinal  
491 study of domestic dogs, which also supported pedigree-based assessments of  
492 such (LeRoy et al. 2015).

493         Surveying lethal equivalents (LE) assumes that trait depression is  
494 caused by deleterious recessive variation found in the homozygous state (or the  
495 equivalent of alleles across loci with a similar contribution towards trait  
496 depression). Pedigree-based estimates of inbreeding revealed a negative  
497 correlation to the number of litters, with an estimation that each wolf likely  
498 carries nearly two LEs in their genome, similar to previous estimates made for  
499 humans, *Drosophila*, and great tits (Szulkin et al. 2007; Gao et al. 2015). This  
500 directly translated to an expected decrease in offspring survival to maturity by  
501 22% due to a full-sibling mating. Nietlisbach and colleagues (2018) conducted  
502 a literature survey and reported that wild vertebrate populations carried on

503 average 3.5 LEs. However, 13 of the 18 studies analyzed represented bird  
504 species, likely across a diversity of mating systems relative to the highly  
505 structured one of gray wolves.

506

507 *Long-term implications*

508         These results provide a valuable baseline through which continued  
509 monitoring can evaluate long-term genetic health of wolves in YNP. Similar  
510 approaches could be applied across a larger geographic scale to monitor  
511 genetic health and connectivity of wolf populations throughout the contiguous  
512 U.S., a task that is identified in the final ESA delisting requirements (USFWS  
513 2020). In light of our findings, the future genetic health of wolves in YNP  
514 depends upon the critical role of gene flow and preserving landscape corridors  
515 to support effective dispersal. The YNP wolf population, which represents the  
516 core of a larger population throughout the Greater Yellowstone Ecosystem,  
517 serves as an important source for wolves that disperse beyond the protective  
518 boundaries (vonHoldt et al. 2010). As the YNP wolf population has stabilized  
519 at lower densities over time, the pedigreed population exhibited an increase in  
520 genome uniqueness (e.g. Table 3), suggestive of successful effective dispersal  
521 that has been documented through field observations of radio-collared  
522 dispersers (Stahler et al. 2020). Although this study does not evaluate gene

523 flow into YNP, our findings suggest that immigration of effective dispersers  
524 over time will be essential for safeguarding their future through the  
525 incorporation of new and adaptive genetic variation. Such variation provides  
526 an important mechanism for rapid evolutionary response to changing  
527 environmental challenges caused by disease, climate change and human  
528 alteration of habitats (Kardos et al. 2021).

529         To maintain larger-scale wolf population connectivity and counteract  
530 loss of genetic variation, natural dispersal dynamics should be promoted and  
531 anthropogenic factors that significantly reduce genetic connectivity and  
532 effective population size should be mitigated (vonHoldt et al. 2010). These  
533 goals face increased challenges under recent wolf management directives in  
534 some northern Rocky Mountain states that aim to significantly reduce the  
535 number of wolves on the landscape. For example, recent legislative actions in  
536 Montana (2021 Montana Code Annotated 87-1-901) and Idaho (2021 Idaho  
537 Senate Bill No.1211) include aggressive policies to reduce wolf population  
538 sizes to levels close to minimum threshold requirements to prevent ESA  
539 relisting (e.g. Idaho SB 1211). These actions include regulations that allow for  
540 killing wolves using methods beyond shooting, such as baiting, snaring,  
541 trapping, night-time hunting on private land, aerial gunning, unlimited quotas,  
542 large numbers of wolf tags per hunter (20 wolves in Montana) or unlimited

543 (Idaho), and extensive hunting seasons (e.g. year-round in Idaho and 6 months  
544 in Montana). If continued, these specific regulations have the potential to  
545 significantly reduce regional wolf population sizes, not only limiting gene flow  
546 into YNP, but disrupting the genetic connectivity that was demonstrated to  
547 have occurred across a larger regional scale following the first decade of wolf  
548 recovery in the western U.S. (vonHoldt et al. 2010). Such management policies  
549 that fail to incorporate larger meta-population dynamics of dispersal and inter-  
550 regional connectivity with adequate effective population sizes could jeopardize  
551 the tremendous success of wolf recovery efforts and genetic health in the  
552 Western United States over the last 25 years.

553

#### 554 **Acknowledgements**

555 We are grateful for funding support from Yellowstone Forever and their many  
556 donors, especially Valerie Gates and Annie and Bob Graham. We also are  
557 appreciative to the many field technicians who continue to document in  
558 amazing details the lives of wolves in Yellowstone National Park. JSS is  
559 partially funded by the NIH (R35GM141798, R01AI153044, R01HG009120)  
560 and the National Science Foundation (DMS-1264153, DEB-0613730, and  
561 DEB-1245373).

562

563 **Conflict of Interest**

564 The authors declare that this work was conducted under no competing financial  
565 interests.

566

567 **Data Archiving**

568 The previously published data analyzed in this study is publicly available on  
569 NCBI's Sequence Read Archive (PRJNA577957). The mapped bam files for  
570 three newly collected individuals can be found at PRJNA743299 with  
571 additional metadata found in Supplemental Table S1.

572 **References**

- 573 Adams JR, Vucetich LM, Hedrick PW, Peterson RO, Vucetich JA (2011)  
574 Genomic sweep and potential genetic rescue during limiting environmental  
575 conditions in an isolated wolf population. *Proc Royal Soc B* 278, 3336-  
576 3344.
- 577 Åkesson M, Liberg O, Sand H, Wabakken P, Bensch S, Flagstad Ø (2016)  
578 Genetic rescue in a severely inbred wolf population. *Mol Ecol* 25, 4745-  
579 4756.
- 580 Åkesson M, Flagstad Ø, Aspi J, Kojola I, Liberg O, Wabakken P, Sand H  
581 (2021) Genetic signature of immigrants and their effect on genetic diversity  
582 in the recently established Scandinavian wolf population. *Conserv Genet*  
583 doi: 10.1007/s10592-021-01423-5.
- 584 Ali OA, O'Rourke SM, Amish SJ, Meek MH, Luikard G, Jeffres C, et al.  
585 (2016) RAD capture (Rapture): Flexible and efficient sequence-based  
586 genotyping. *Genetics* 202, 389-400.
- 587 Biscarini F, Cozzi P, Gaspa G, Marras G (2018) detectRuns package for R.  
588 Retrieved from <https://github.com/bioinformatics->  
589 [ptp/detectRUNS/tree/master/detectRUNS](https://github.com/bioinformatics-ptp/detectRUNS/tree/master/detectRUNS)

- 590 Boichard D, Maignel L, Verrier E (1997) The value of using probabilities of  
591 gene origin to measure genetic variability in a population. *Genet Sel Evol*  
592 29, 5-23.
- 593 Boyce MS (2018) Wolves for Yellowstone: dynamics in time and space. *J*  
594 *Mammal* 99(5), 1021-1031.
- 595 Ceballos FC, Joshi PL, Clark DW, Ramsay M, Wilson JF (2018) Runs of  
596 homozygosity: windows into population history and trait architecture. *Nat*  
597 *Rev Genet* 19, 220-234.
- 598 Chang CC, Chow CC, Tellier LCAM, Vattikuti S, Purcell SM, Lee JJ (2015)  
599 Second-generation PLINK: rising to the challenge of larger and richer  
600 datasets. *GigaScience* 4, s13742-015-0047-8.
- 601 Charlesworth D, Willis JH (2009) The genetics of inbreeding depression. *Nat*  
602 *Rev Genet* 10, 783-796.
- 603 Chu ET, Simpson MJ, Diehl K, Page RL, Sams AJ, et al. (2019) Inbreeding  
604 depression causes reduced fecundity in Golden Retrievers. *Mamm Genome*  
605 30, 166-172.
- 606 Clutton-Brock TH (2016) *Mammal Societies*. West Sussex: Wiley-Blackwell.
- 607 Coltman DW, Pilkington JG, Smith JA, Pemberton JM (1999) Parasite-  
608 mediated selection against inbred Soay sheep in a free-living island  
609 population. *Evolution* 53(4), 1259-1267.



- 610 Cornuet JM, Luikart G (1996) Description and power analysis of two tests for  
611 detecting recent population bottlenecks from allele frequency data.  
612 *Genetics* 144, 2001-2014.
- 613 Crow JF, Kimura M (1970) *An Introduction to Population Genetics Theory*.  
614 Harper & Row: New York.
- 615 Curik I, Ferencakovic M, Sölkner J (2017) Genomic dissection of inbreeding  
616 depression: a gate to new opportunities. *Braz J Anim Sci* 46(9), 773-782.
- 617 Daniels SJ, Walters JR (2000) Inbreeding depression and its effects on natal  
618 dispersal in red-cockaded woodpeckers. *Biol Appl* 102(3), 482-491.
- 619 DeCandia AL, Schrom ED, Brandell EE, Stahler DR, vonHoldt BM (2021)  
620 Sarcoptic mange severity is associated with reduced genomic variation and  
621 evidence of selection in Yellowstone National park wolves (*Canis lupus*).  
622 *Evol Appl* DOI: 10.1111/eva.13127
- 623 Ellegren H (1999) Inbreeding and relatedness in Scandinavian grey wolves  
624 *Canis lupus*. *Hereditas* 130(3), 239-244.
- 625 Flagstad Ø, Walker CW, Vilà C, Sundqvist A-K, Fernholm B, Hufthammer  
626 AK, Wiig Ø, Koyola I, Ellegren H (2003) Two centuries of the  
627 Scandinavian wolf population: patterns of genetic variability and migration  
628 during an era of dramatic decline. *Mol Ecol* 12(4), 869-880.

- 629 Frankham R (1995) Effective population-size adult-population size ratios in  
630 wildlife – a review. *Genet Res* 66, 95-107.
- 631 Fritts SH, Bangs EE, Fontaine JA, Johnson MR, Phillips MK, Koch ED, et al.  
632 (1997) Planning and implementing reintroduction of wolves to  
633 Yellowstone National Park and central Idaho. *Restor Ecol* 5, 7-24.
- 634 Gao Z, Waggoner D, Stephens M, Ober C, Przeworski M (2015) An estimate  
635 of the average number of recessive lethal mutations carried by humans.  
636 *Genetics* 199(4), 1243-1254.
- 637 Hedrick PW, Kalinowski ST (2000) Inbreeding depression in conservation  
638 biology. *Annu Rev Ecol Syst* 31, 139-162.
- 639 Hedrick PW, Peterson RO, Vucetich LM, Adams JR, Vucetich JA (2014)  
640 Genetic rescue in Isle Royale wolves: Genetic analysis and the collapse of  
641 the population. *Conserv Genet* 15, 1111-1121.
- 642 Hedrick PW, Garcia-Dorado A (2016) Understanding inbreeding depression,  
643 purging, and genetic rescue. *Trends Ecol Evol* 31(12), 940-952.
- 644 Huisman J, Kruuk LEB, Ellis PA, Clutton-Brock T, Pemberton JM (2016)  
645 Inbreeding depression across the lifespan in a wild mammal population.  
646 *Proc Natl Acad Sci USA* 113, 3585-3590.

- 647 Huisman J (2017) Pedigree reconstruction from SNP data: parentage  
648 assignment, sibship clustering and beyond. *Mol Ecol Resour* 17, 1009-  
649 1024.
- 650 Jennions MD, Macdonald DW (1994) Cooperative breeding in mammals.  
651 *Trends Ecol Evol* 9(3), 89-93.
- 652 Jiménez-Mena B, Schad K, Hanna N, Lacey RC (2016) Pedigree analysis for  
653 the genetic management of group-living species. *Ecol Evol* 6, 3067-3078.
- 654 Kalinowski ST, Hedrick PW, Miller PS (2000) A close look at inbreeding  
655 depression in the Speke's gazelle captive breeding program. *Conserv Biol*  
656 14(5), 1375-1384.
- 657 Kalinowski ST, Hedrick PW (2001) Inbreeding depression in captive bighorn  
658 sheep. *Anim Conserv* 4(4), 319-324.
- 659 Kardos M, Luikart G, Allendorf FW (2015) Measuring individual inbreeding  
660 in the age of genomics: marker-based measures are better than pedigrees.  
661 *Heredity* 115, 63-72.
- 662 Kardos M, Armstrong EE, Fitzpatrick SW, Hauser S, Hedrick PW, Miller JM,  
663 Tallmon DA, Funk WC (2021) The crucial role of genome-wide genetic  
664 variation in conservation. *P Natl Acad Sci USA* 118(48), e2104642118.
- 665 Keller L (2002) Inbreeding effects in wild populations. *Trends Ecol Evol* 17,  
666 230-241.

- 667 Keller L, Reeve HK (1994) Partitioning of reproduction in animal societies,  
668 *Trends Ecol Evol* 9, 98-103.
- 669 Keller LF, Waller DM (2002) Inbreeding effects in wild populations. *Trends*  
670 *Ecol Evol* 17, 230-241.
- 671 Keller M, Visscher P, Goddard M (2011) Quantification of inbreeding due to  
672 distant ancestors and its detection using dense SNP data. *Genetics* 189,  
673 237-249.
- 674 Komdeur J, Deerenberg C (1997) The importance of social behavior studies  
675 for conservation In: Clemmons JR, Buchholz R (eds) *Behavioral*  
676 *approaches to conservation in the wild*, Cambridge University Press:  
677 United Kingdom. pp.262-276.
- 678 Lacy RC (1997) Importance of genetic variation to the viability of mammalian  
679 populations. *J Mammal* 78(2), 320-335.
- 680 Laikre L, Ryman N (1991) Inbreeding depression in a captive wolf (*Canis*  
681 *lupus*) population. *Conserv Biol* 5, 33-40.
- 682 Laikre L, Ryman N, Thompson EA (1993) Hereditary blindness in a captive  
683 wolf (*Canis lupus*) population: Frequency reduction of a deleterious allele  
684 in relation to gene conservation. *Conserv Biol* 7, 592-601.
- 685 Lanfear R, Kokko H, Eyre-Walker A (2014) Population size and the rate of  
686 evolution. *Trends Ecol Evol* 29, 33-41.

- 687 LeRoy G, Phocas F, Hedan B, Verrier E, Rognon X (2015) Inbreeding impact  
688 on litter size and survival in selected canine breeds. *Vet J* 203(1), 74-78.
- 689 Liberg O, Andrén H, Pedersen HC, Sand H, Sejberg D, Wabakken P, et al.  
690 (2005) Severe inbreeding depression in a wild wolf (*Canis lupus*)  
691 population. *Biol Letters* 1, 17-20.
- 692 Lynch M, Walsh B (1998) *Genetics and Analysis of Quantitative Traits*. Sinauer  
693 Associates, Inc.: Massachusetts.
- 694 Marras G, Gaspa G, Sorbolini S, Dimauro C, Ajmone-Marsan P, et al. (2015)  
695 Analysis of runs of homozygosity and their relationship with inbreeding in  
696 five cattle breeds farmed in Italy. *Anim Genet* 46, 110-121.
- 697 McQuillan R, Leutenegger A, Abdel-Rahman R, Franklin C, Pericic M, Barac-  
698 Lauc L, et al. (2008) Runs of homozygosity in European populations.  
699 *American J Hum Genet* 83, 359-372.
- 700 McLaren W, Gil L, Hunt SE, Riat HD, Ritchie GR, Thormann A, et al. (2016)  
701 The Ensembl Variant Effect Predictor. *Genome Biol* 17, 122
- 702 Milligan BG (2003) Maximum-likelihood estimation of relatedness. *Genetics*  
703 163, 1153-1167.
- 704 Nielsen JF, English S, Goodall-Copestake WP, Wang J, Walling CA, Bateman  
705 AW, et al. (2012) Inbreeding and inbreeding depression of early life traits  
706 in a cooperative mammal. *Mol Ecol* 21(11), 2788-2804.

- 707 Nietlisbach P, Muff S, Reid JM, Witlock MC, Keller LF (2018) Nonequivalent  
708 lethal equivalents: Models and inbreeding metrics for unbiased estimation  
709 of inbreeding load. *Evol Appl* 12(2), 266-279.
- 710 Pemberton TJ, Szpiech ZA (2018) Relationship between deleterious variation,  
711 genomic autozygosity, and disease risk: insights from The 1000 Genomes  
712 Project. *Am J Hum Genet* 102, 658-675.
- 713 Pew J, Muir PJ, Wang J, Frasier TR (2015) related: An R package for  
714 analyzing pairwise relatedness from codominant molecular markers. *Mol*  
715 *Ecol Resour* 15, 557-561.
- 716 Quinlan AR, Hall IM (2010) BEDTools: a flexible suite of utilities for  
717 comparing genomic features. *Bioinformatics* 26, 841-842.
- 718 R Core Team (2019) A language and environment for statistical computing.  
719 Vienna: R Foundation for Statistical Computing.
- 720 Räikkönen J, Vucetich JA, Peterson RO, Nelson MP (2009) Congenital bone  
721 deformities and the inbred wolves (*Canis lupus*) of Isle Royale. *Biol*  
722 *Conserv* 142, 1025-1031.
- 723 Räikkönen J, Vucetich LM, Vucetich JA, Peterson RO, Nelson MP (2013)  
724 What the inbred Scandinavian wolf population tells us about the nature of  
725 conservation. *PLoS ONE* 8, e67218.

- 726 Ralls K, Ballou JD, Templeton A (1988) Estimates of lethal equivalents and  
727 the cost of inbreeding in mammals. *Conserv Biol* 2(2), 185-193.
- 728 Robinson JA, Rääkkönen J, Vucetich LM, Vucetich JA, Peterson RO,  
729 Lohmueller KE, et al. (2019) Genomic signatures of extensive inbreeding  
730 in Isle Royale wolves, a population on the threshold of extinction. *Sci Adv*  
731 5(5), eaau0757.
- 732 Rowe G, Beebee TJC (2004) Reconciling genetic and demographic estimators  
733 of effective population size in the anuran amphibian *Bufo calamita*.  
734 *Conservation Genetics* 5, 287-298.
- 735 Sands J, Creel S (2004) Social dominance, aggression and faecal  
736 glucocorticoid levels in a wild population of wolves, *Canis lupus*. *Anim*  
737 *Behav* 67(3), 387-396.
- 738 Smith DW, Cassidy KA, Stahler DR, MacNulty DR, Harrison Q, Balmford B,  
739 et al. (2020) Population dynamics and demography. In D. W. Smith, D. R.  
740 Stahler, & D. R. MacNulty (Eds.), *Yellowstone wolves: Science, and*  
741 *discovery in the world's first national park* (pp. 77-92). University of  
742 Chicago Press.
- 743 Stahler DR, MacNulty DR, Wayne RK, vonHoldt B, Smith DW (2013) The  
744 adaptive value of morphological, behavioural and life-history traits in  
745 reproductive female wolves. *J Anim Ecol* 82(1), 222-234.

- 746 Stahler DR, vonHoldt BM, Heppenheimer E, Wayne RK (2020) Yellowstone  
747 wolves at the frontiers of genetic research. In D. W. Smith, D. R. Stahler,  
748 & D. R. MacNulty (Eds.), *Yellowstone wolves: Science, and discovery in*  
749 *the world's first national park* (pp. 42–60). University of Chicago Press.
- 750 Szpiech ZA, Xu J, Pemberton TJ, Peng W, Zollner S, Rosenberg NA, Li JZ  
751 (2013) Long runs of homozygosity are enriched for deleterious variation.  
752 *Am J Hum Genet* 93, 90-102.
- 753 Szulkin M, Garant D, McCleery RH, Sheldon BC (2007) Inbreeding depression  
754 along a life-history continuum in the great tit. *J Evol Biol* 20(4), 1531-  
755 1543.
- 756 USFWS (United States Fish and Wildlife Service). 2020. Removing the gray  
757 wolf (*Canis lupus*) from the list of endangered and threatened wildlife;  
758 Final Rule. Federal Register 85 FR 69778-69895.
- 759 vonHoldt BM, Stahler DR, Smith DW, Earl DA, Pollinger JP, Wayne RK  
760 (2008) The genealogy and genetic viability of reintroduced Yellowstone  
761 grey wolves. *Mol Ecol* 17, 252-274.
- 762 vonHoldt BM, Stahler DR, Bangs EE, Smith DW, Jimenez MD, et al. (2010)  
763 A novel assessment of population structure and gene flow in grey wolf  
764 populations of the Northern Rocky Mountains of the United States. *Mol*  
765 *Ecol* 19(20), 4412-4427.



- 766 vonHoldt BM, DeCandia AL, Heppenheimer E, Janowitz-Koch I, Shi R, Zhou  
767 H, et al. (2020) Heritability of interpack aggression in a wild pedigreed  
768 population of North American grey wolves. *Mol Ecol* DOI:  
769 10.1111/mec.15349
- 770 Wang J, Santiago E, Caballero A (2016) Prediction and estimation of effective  
771 population size. *Heredity* 117, 193-206.
- 772 Wright S (1931) Evolution in Mendelian populations. *Genetics* 16, 97-159.
- 773 Wright S (1969) Evolution and the genetics of populations, vol 2. The theory  
774 of gene frequencies. University of Chicago Press: Illinois.
- 775
- 776

777 **Figure 1. A)** Number of litters (log10) as a function of pedigree-based  
778 inbreeding coefficient ( $F$ ) estimates with data from 158 Yellowstone gray  
779 wolves (product moment correlation coefficient,  $r=-0.11$ ; Spearman rank  
780 correlation coefficient,  $r_s=0.27$ ). **B)** Linkage disequilibrium decay for  
781 Yellowstone gray wolves ( $n$ , all=391, breeding=122, non-breeding=235,  
782 unknown=4) genotyped at 56K SNPs. **C)** Number of runs of homozygosity  
783 (ROH; minimum of 10 SNPs per 10Kb track) detected in 6Mb tracks and the  
784 related inbreeding coefficients ( $F_{ROH}$ ) estimated for 391 gray wolves. The  
785 length of the genome used for ROH estimates is 2 323 956 222bp for the  
786 pruned 24K SNP set. (Abbreviations:  $n$ , number of individuals). **D)** Violin  
787 box-and-whisker jitter plots of genome-wide inbreeding coefficients estimated  
788 from runs of homozygosity ( $F_{ROH}$ ) detected in 6Mb tracks for 24K pruned  
789 SNPs (minimum of 10 SNPs per 10Kb track). Welch two sample t-test  
790 statistics are provided.

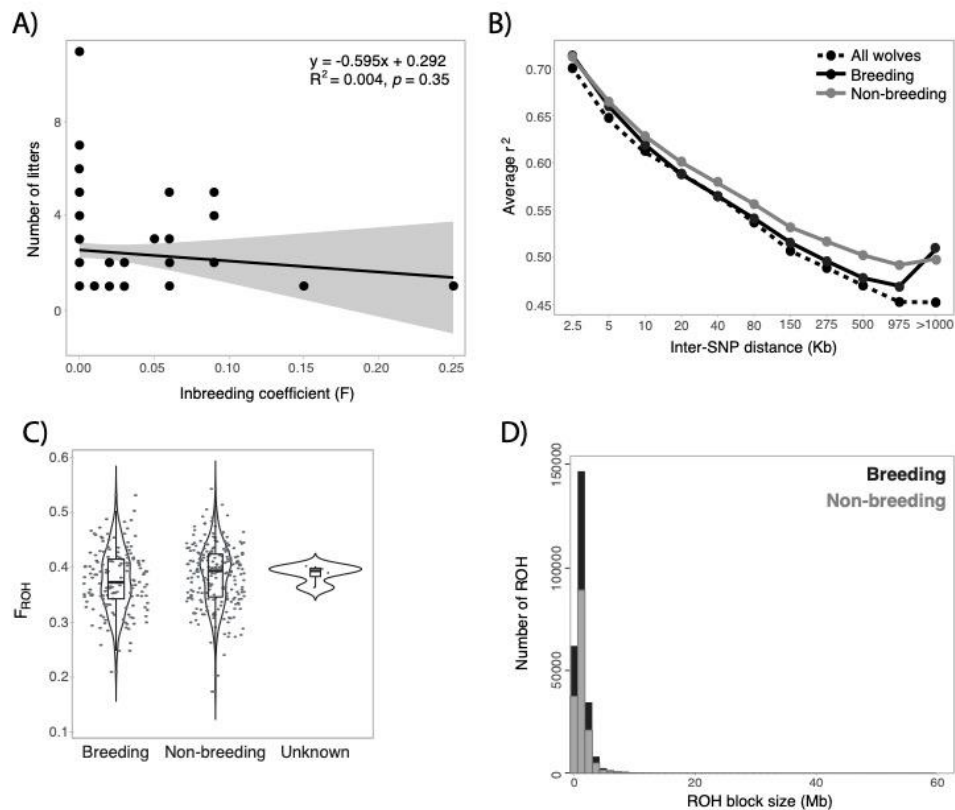

791

792

793 **Figure 2. A)** Distribution of the number of individuals per age at event of first  
 794 litter (age\_first\_litter) when born after 1995, stratified by sex. The **B)** density  
 795 plot of traits with respect to reproductive status (Abbreviations:  $N_{\text{litters}}$ , number  
 796 of litters;  $H_o$ , observed heterozygosity, prop\_Low, proportion of SNPs with  
 797 low predicted impact; prop\_Moder, proportion of SNPs with moderate  
 798 predicted impact; prop\_High, proportion of SNPs with high predicted impact;  
 799 prop\_Modif, proportion of SNPs predicted to be modifiers), and **C)** pairwise  
 800 correlation plot (scale bar indicates direction and magnitude of correlation) of  
 801 life-history traits for 276 wolves with known year of birth and death. **D)** Box-  
 802 and-whisker plot of genome-wide inbreeding coefficients estimated from runs  
 803 of homozygosity ( $F_{\text{ROH}}$ ) as a function of age at first litter.

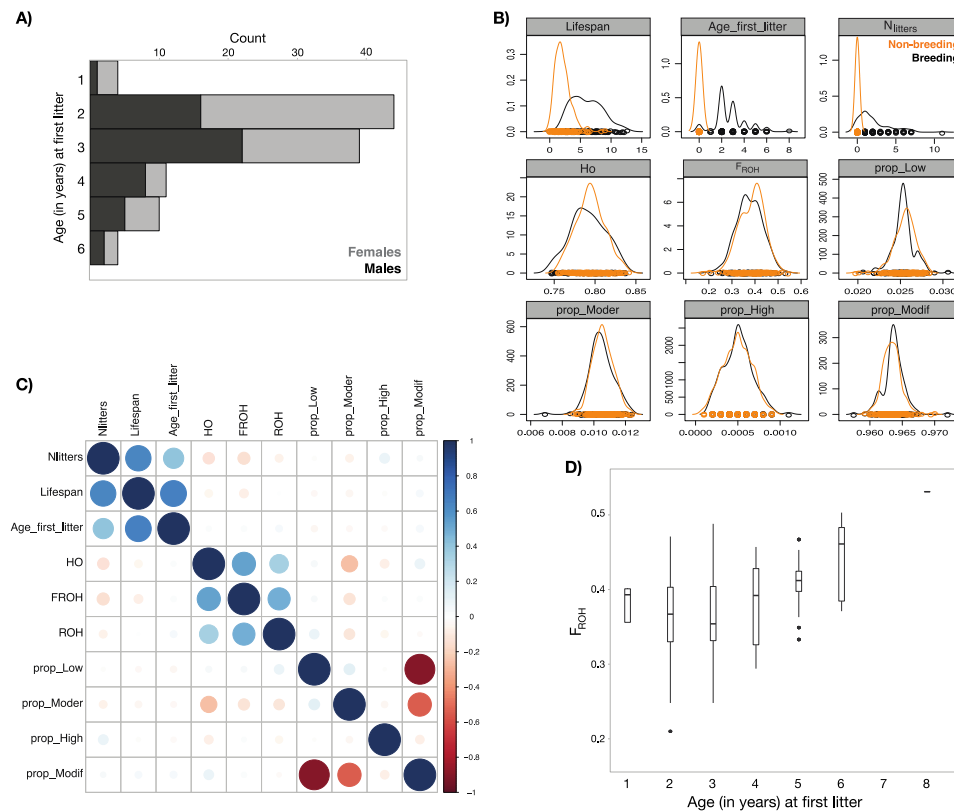

804

805

806 **Table 1.** Estimates of the pedigree founder contributions and genomic uniqueness in Yellowstone gray wolves.  
 807 Genome uniqueness (*GU*) is the probability that a gene from the pedigree foundation was inherited ‘uniquely’  
 808 with respect to other pedigree founders. (Abbreviations: *pAR*, proportion of alleles retained; *pC*, proportion of  
 809 genes in the pedigreed population due to that founder; YNP, Yellowstone National Park)

| Founder ID   | Source Pack (age class and sex)* | YNP Pack          | <i>pC</i> | <i>pAR</i> | <i>GU</i> |
|--------------|----------------------------------|-------------------|-----------|------------|-----------|
| 004M         | Petite Lake (adult male)         | Mollies           | 0.08      | 0.94       | 0.00      |
| 005F         | Petite Lake (adult female)       | Mollies           | 0.09      | 1.00       | 0.00      |
| 009F         | McLeod (adult female)            | Rose Creek        | 0.12      | 1.00       | 0.00      |
| 010M         | Rick’s (adult male)              | Rose Creek        | 0.08      | 0.99       | 0.00      |
| 013M         | Berland (adult male)             | Yellowstone Delta | 0.02      | 0.98       | 0.01      |
| 014F         | Berland (adult female)           | Yellowstone Delta | 0.02      | 0.99       | 0.00      |
| 015M         | Berland (male pup)               | Yellowstone Delta | 0.00      | 0.50       | 0.33      |
| 027F         | Halfway (adult female)           | Nez Perce         | 0.04      | 0.99       | 0.00      |
| 028M         | Halfway (adult male)             | Nez Perce         | 0.04      | 0.99       | 0.00      |
| 035M         | Chief (adult male)               | Lone Star         | 0.00      | 0.88       | 0.25      |
| 036F         | Besa (adult female)              | Lone Star         | 0.00      | 0.50       | 1.00      |
| 038M         | Prophet (adult male)             | Druid Peak        | 0.02      | 0.99       | 0.00      |
| 039F         | Besa (adult female)              | Druid Peak        | 0.03      | 0.88       | 0.00      |
| Y38          | Unknown (adult male)             | ***               | 0.02      | 0.50       | 0.00      |
| Y53          | Kravec (adult female)            | ***               | 0.01      | 0.87       | 0.06      |
| Sawtooth F** | Sawtooth (adult female)          | Nez Perce         | 0.04      | 1.00       | 0.00      |
| Sawtooth M** | Sawtooth (adult male)            | Nez Perce         | 0.04      | 1.00       | 0.00      |

810 \* The name of the pack in Canada from which the founder was captured.

811 \*\* These two entries represent the known (and unsampled) parents of 10 full-sibling pups translocated (and  
812 genetically sampled) from the Sawtooth pack in northwestern Montana and fostered by the Nez Perce pack. Two of  
813 the translocated Sawtooth individuals assumed a breeding status in Yellowstone and represent gene flow  
814 (outbreeding) events.  
815 \*\*\* Offspring of these individuals were translocated to the Chief Joseph pack in YNP.  
816  
817  
818

819 **Table 2.** Influential ancestors identified by their marginal contribution (MC) to  
 820 the total pedigree of YNP wolves. (Abbreviations: F, female; M, male)

| Field ID     | Source Pack (age class) | YNP pack          | MC   |
|--------------|-------------------------|-------------------|------|
| 004M         | Petite Lake (dominant)  | Mollies           | 0.08 |
| 005F         | Petite Lake (dominant)  | Mollies           | 0.09 |
| 006M         | Petite Lake (pup)       | Mollies           | 0.02 |
| 007F         | Mcleod (pup)            | Rose Creek        | 0.03 |
| 009F         | Mcleod (dominant)       | Rose Creek        | 0.12 |
| 010M         | Rick's (dominant)       | Rose Creek        | 0.08 |
| 013M         | Berland (dominant)      | Yellowstone Delta | 0.01 |
| 014F         | Berland (dominant)      | Yellowstone Delta | 0.01 |
| 027F         | Halfway (dominant)      | Nez Perce         | 0.01 |
| 028M         | Halfway (dominant)      | Nez Perce         | 0.01 |
| 034M         | Unknown (dominant)      | Chief Joseph      | 0.04 |
| 038M         | Prophet (dominant)      | Druid Peak        | 0.02 |
| 039F         | Besa (dominant)         | Druid Peak        | 0.03 |
| 040F         | Besa pack (pup)         | Druid Peak        | 0.01 |
| 042F         | Besa pack (pup)         | Druid Peak        | 0.01 |
| 048F*        | -                       | Nez Perce         | 0.07 |
| 072M         | Sawtooth pack (pup)     | Nez Perce         | 0.07 |
| Y53          | Kravec (female)         | ***               | 0.01 |
| Sawtooth F** | Sawtooth (female)       | Nez Perce         | 0.01 |
| Sawtooth M** | Sawtooth (male)         | Nez Perce         | 0.01 |

821 \* The first generation of offspring born in YNP's Nez Perce pack by founders  
 822 027F and 028M.

823 \*\* These two entries represent the known (and unsampled) parents of 10 full-  
 824 sibling pups translocated (and genetically sampled) from the Sawtooth pack in  
 825 northwestern Montana and fostered by the Nez Perce pack. Two of the  
 826 translocated Sawtooth individuals assumed a breeding status in Yellowstone  
 827 and represent gene flow (outbreeding) events.

828 \*\*\* Offspring of these individuals were translocated to the Chief Joseph pack  
 829 in YNP.

830

831 **Table 3.** Annual metrics of the pedigreed gray wolf population in Yellowstone  
832 National Park with known birth and death dates. Genomic uniqueness (*GU*) is  
833 an intra-annual population metric. (Abbreviations: *fa*, number of effective  
834 founders; *fe*, number of found equivalents; *fg*, number of founder genome  
835 equivalents; *MK*, mean kinship; *N*, annual sample size analyzed)

| Year | N  | <i>MK</i> % | <i>GU</i> % | <i>fe</i> | <i>fg</i> | <i>fa</i> |
|------|----|-------------|-------------|-----------|-----------|-----------|
| 1995 | 18 | 7.4         | 20.2        | 8.3       | 7.8       | 8.3       |
| 1996 | 36 | 5.2         | 9.0         | 11.4      | 10.9      | 11.4      |
| 1997 | 59 | 4.9         | 4.9         | 13.1      | 12.2      | 12.9      |
| 1998 | 67 | 6.9         | 4.7         | 10.0      | 9.2       | 9.9       |
| 1999 | 72 | 7.3         | 5.5         | 9.7       | 8.8       | 9.6       |
| 2000 | 86 | 6.0         | 4.3         | 11.7      | 10.4      | 11.3      |
| 2001 | 89 | 5.9         | 3.0         | 12.4      | 10.8      | 11.9      |
| 2002 | 88 | 6.1         | 3.5         | 12.6      | 10.6      | 11.9      |
| 2003 | 92 | 6.3         | 3.4         | 12.6      | 10.3      | 11.7      |
| 2004 | 91 | 5.8         | 3.8         | 13.8      | 11.2      | 12.3      |
| 2005 | 78 | 6.3         | 5.3         | 13.6      | 10.7      | 12.1      |
| 2006 | 70 | 7.3         | 5.4         | 12.8      | 9.3       | 11.0      |
| 2007 | 84 | 7.0         | 5.0         | 14.4      | 9.8       | 12.4      |
| 2008 | 76 | 7.6         | 5.4         | 14.1      | 9.1       | 11.5      |
| 2009 | 65 | 8.1         | 7.1         | 13.3      | 8.6       | 10.9      |
| 2010 | 58 | 8.4         | 5.5         | 13.3      | 8.3       | 10.8      |
| 2011 | 53 | 8.1         | 8.9         | 14.2      | 8.6       | 12.0      |
| 2012 | 40 | 8.3         | 11.2        | 14.6      | 8.4       | 13.1      |
| 2013 | 29 | 8.2         | 13.4        | 15.8      | 8.3       | 12.3      |
| 2014 | 30 | 7.2         | 16.9        | 16.8      | 9.4       | 13.8      |
| 2015 | 28 | 7.4         | 13.1        | 17.0      | 9.2       | 14.5      |
| 2016 | 22 | 8.5         | 15.1        | 15.4      | 7.9       | 11.5      |
| 2017 | 16 | 10.2        | 18.0        | 13.5      | 6.6       | 10.2      |
| 2018 | 10 | 12.0        | 28.5        | 13.8      | 5.3       | 7.8       |
| 2019 | 1  | --          | --          | 6.4       | 0.9       | 2.0       |

836

837

838 **Table 4.** Annual population averages of observed heterozygosity ( $H_O$ )  
 839 estimated from 56K SNPs and inbreeding coefficients ( $F_{ROH}$ ) from 24K pruned  
 840 SNPs genotyped in breeding and non-breeding gray wolves of Yellowstone  
 841 National Park (B and NB, respectively) with known years of birth and death.  
 842 When census size also includes individuals of unknown breeding status.  
 843 Significance was assessed by a 1-way ANOVA. (Abbreviations:  $N_G$ , number  
 844 of individuals genotyped; NS, not significant)

| Year | $N_B, N_{NB} (N_G)$ | $H_O$      | $F_{ROH}$  | ANOVA $F, p$                                           |
|------|---------------------|------------|------------|--------------------------------------------------------|
| 1995 | 23, 6 (29)          | 0.78, 0.79 | 0.34, 0.31 | NS                                                     |
| 1996 | 27, 16 (43)         | 0.78, 0.79 | 0.33, 0.34 | NS                                                     |
| 1997 | 38, 24 (62)         | 0.78, 0.79 | 0.35, 0.36 | NS                                                     |
| 1998 | 37, 28 (65)         | 0.79, 0.80 | 0.36, 0.39 | NS                                                     |
| 1999 | 36, 35 (71)         | 0.79, 0.80 | 0.37, 0.39 | NS                                                     |
| 2000 | 49, 37 (86)         | 0.79, 0.79 | 0.36, 0.37 | NS                                                     |
| 2001 | 50, 37 (88)         | 0.79, 0.79 | 0.37, 0.38 | NS                                                     |
| 2002 | 52, 39 (92)         | 0.79, 0.79 | 0.37, 0.38 | NS                                                     |
| 2003 | 58, 44 (103)        | 0.79, 0.80 | 0.38, 0.36 | NS                                                     |
| 2004 | 58, 52 (111)        | 0.79, 0.80 | 0.38, 0.38 | NS                                                     |
| 2005 | 52, 49 (101)        | 0.80, 0.80 | 0.38, 0.39 | NS                                                     |
| 2006 | 57, 36 (93)         | 0.80, 0.80 | 0.39, 0.39 | NS                                                     |
| 2007 | 62, 46 (108)        | 0.79, 0.79 | 0.38, 0.39 | NS                                                     |
| 2008 | 57, 42 (99)         | 0.79, 0.79 | 0.39, 0.38 | NS                                                     |
| 2009 | 56, 27 (83)         | 0.80, 0.79 | 0.39, 0.40 | NS                                                     |
| 2010 | 48, 26 (74)         | 0.80, 0.80 | 0.39, 0.40 | NS                                                     |
| 2011 | 46, 29 (75)         | 0.80, 0.81 | 0.39, 0.41 | $H_O$ 4.19, $p=0.0444$                                 |
| 2012 | 34, 24 (58)         | 0.79, 0.81 | 0.38, 0.42 | $H_O$ 9.58, $p=0.0031$ ;<br>$F_{ROH}$ 5.64, $p=0.0210$ |
| 2013 | 33, 13 (46)         | 0.79, 0.80 | 0.38, 0.40 | $H_O$ 3.80, $p=0.0576$                                 |
| 2014 | 32, 18 (50)         | 0.79, 0.79 | 0.39, 0.40 | NS                                                     |
| 2015 | 28, 18 (46)         | 0.79, 0.79 | 0.39, 0.39 | NS                                                     |
| 2016 | 23, 19 (42)         | 0.79, 0.79 | 0.39, 0.40 | NS                                                     |
| 2017 | 20, 20 (40)         | 0.79, 0.80 | 0.39, 0.40 | NS                                                     |
| 2018 | 12, 12 (24)         | 0.79, 0.79 | 0.40, 0.40 | NS                                                     |

845

846



847 **Table 5.** Cox proportional hazards regression with age at first litter as the  
848 outcome response. Time is recorded in years and represents time to first litter  
849 (n=139) or time to last observation or death (n=238) whichever is sooner. Data  
850 from animals who die or are no longer observed before reproducing are  
851 considered censored. The predictors are time invariant and have been  
852 standardized. The best fitting model (bolded) has the lowest Akaike  
853 information criterion (AIC). (Abbreviations: Ho, observed heterozygosity)

| Predictor      | Log hazard<br>coefficient | Model <i>p</i> | AIC           |
|----------------|---------------------------|----------------|---------------|
| Base model Sex | -0.5702                   | 0.0012         | 1264.4        |
| Ho             | 0.0186                    | 0.8800         | 1266.4        |
| Sex            | -0.5721                   | 0.0012         |               |
| <b>FROH</b>    | <b>-0.2406</b>            | <b>0.0203</b>  | <b>1261.4</b> |
| <b>Sex</b>     | <b>-0.5674</b>            | <b>0.0012</b>  |               |
| propHigh       | 0.1103                    | 0.2222         |               |
| Sex            | -0.5526                   | 0.0017         | 1264.9        |
| propModer      | -0.0563                   | 0.5554         |               |
| Sex            | -0.5558                   | 0.0017         | 1266.1        |
| propModif      | 0.1226                    | 0.1697         |               |
| Sex            | -0.5955                   | 0.0008         | 1264.6        |
| propLow        | -0.1299                   | 0.1432         |               |
| Sex            | -0.6172                   | 0.0006         | 1264.3        |

854  
855

856 **Supplemental Table S1.** Sample information and meta-data for 474 Yellowstone gray wolves in pedigree analysis.  
 857 Genetic or field-confirmed parentage as well as their natal pack name is provided. Individuals with genetic data  
 858 included in this study are indicated in the “RADseq data” column. Individuals that founded the population are noted  
 859 with one or both parents listed as “Canada” as per unknown pedigree information. (Abbreviations: F, female; M,  
 860 male; YOB, year of birth; YOD, year of death)

| Field_ID | Mother_ID | Father_ID | YOB  | YOD  | Natal Pack      | Pedigree_F | Number of litters from pedigree | RADseq data | Notes       | Sample_ID in SRA |
|----------|-----------|-----------|------|------|-----------------|------------|---------------------------------|-------------|-------------|------------------|
| 002M     | 005F      | 004M      | 1994 | 2002 | Crystal/Mollies | 0          | 6                               | Yes         | YNP founder | 227              |
| 003M     | 005F      | 004M      | 1994 | 1996 | Crystal/Mollies | 0          | 0                               |             | YNP founder | 003M             |
| 008M     | 005F      | 004M      | 1994 | 2000 | Crystal/Mollies | 0          | 6                               | Yes         | YNP founder | 228              |
| 118M     | 005F      | 006M      | 1997 | 1999 | Crystal         | 0          | 1                               | Yes         |             | 222              |
| 120M     | 005F      | 006M      | 1997 | 2000 | Crystal         | 0          | 1                               | Yes         |             | 275              |
| 122M     | 005F      | 006M      | 1997 | 1999 | Crystal         | 0          | 0                               | Yes         |             | 8749             |
| 136F     | 005F      | 006M      | 1997 | 2000 | Crystal         | 0          | 0                               | Yes         |             | 223              |
| 303M     | 005F      | 006M      | 1997 | 2008 | Mollie's        | 0          | 7                               | Yes         |             | 339              |
| 243M     | 005F      | 006M      | 1998 | 2002 | Crystal         | 0          | 1                               | Yes         |             | 306              |
| 256M     | 005F      | 006M      | 2000 |      | Crystal         | 0          | 1                               |             |             | 256M             |
| 055M     | 007F      | 002M      | 1996 | 2000 | Leopold         | 0          | 0                               | Yes         |             | 689              |
| 207M     | 007F      | 002M      | 1996 | 2003 | Leopold         | 0          | 1                               | Yes         |             | 207M             |
| 095F     | 007F      | 002M      | 1997 | 1998 | Leopold         | 0          | 0                               | Yes         |             | 224              |
| 151F     | 007F      | 002M      | 1997 | 2008 | Leopold         | 0          | 6                               | Yes         |             | 151F             |
| 165M     | 007F      | 002M      | 1997 | 1999 | Leopold         | 0          | 2                               | Yes         |             | 573              |
| 148F     | 007F      | 002M      | 1998 | 2001 | Leopold         | 0          | 0                               | Yes         |             | 5409             |
| 150M     | 007F      | 002M      | 1998 | 2004 | Leopold         | 0          | 0                               | Yes         |             | 632              |

|      |      |        |      |      |            |   |    |     |             |      |
|------|------|--------|------|------|------------|---|----|-----|-------------|------|
| 152F | 007F | 002M   | 1998 | 2005 | Leopold    | 0 | 5  | Yes |             | 233  |
| 300M | 007F | 002M   | 1999 | 2003 | Leopold    | 0 | 0  | Yes |             | 336  |
| 209F | 007F | 002M   | 2000 | 2008 | Leopold    | 0 | 3  | Yes |             | 284  |
| 259F | 007F | 002M   | 2000 | 2003 | Leopold    | 0 | 1  | Yes |             | 320  |
| 296M | 007F | 002M   | 2000 | 2003 | Leopold    | 0 | 1  | Yes |             | 335  |
| 302M | 007F | 002M   | 2000 | 2009 | Leopold    | 0 | 4  | Yes |             | 5421 |
| 288F | 007F | 002M   | 2001 | 2006 | Leopold    | 0 | 2  | Yes |             | 230  |
| 301M | 007F | 002M   | 2001 | 2006 | Leopold    | 0 | 1  | Yes |             | 337  |
| 007F | 009F | Canada | 1994 | 2002 | Rose Creek | 0 | 6  | Yes | YNP founder | 231  |
| 016F | 009F | 010M   | 1995 | 2000 | Rose Creek | 0 | 5  | Yes | YNP founder | 246  |
| 017F | 009F | 010M   | 1995 | 1997 | Rose Creek | 0 | 1  | Yes | YNP founder | 247  |
| 018F | 009F | 010M   | 1995 |      | Rose Creek | 0 | 4  |     | YNP founder | 018F |
| 019F | 009F | 010M   | 1995 | 1997 | Rose Creek | 0 | 0  | Yes | YNP founder | 248  |
| 020M | 009F | 010M   | 1995 | 1996 | Rose Creek | 0 | 0  | Yes | YNP founder | 249  |
| 021M | 009F | 010M   | 1995 | 2004 | Rose Creek | 0 | 11 | Yes | YNP founder | 250  |
| 022M | 009F | 010M   | 1995 | 1995 | Rose Creek | 0 | 0  | Yes | YNP founder | 251  |
| 155F | 009F | 008M   | 1998 | 2001 | Rose Creek | 0 | 0  | Yes |             | 695  |
| 161M | 009F | 008M   | 1998 | 2001 | Rose Creek | 0 | 0  | Yes |             | 7887 |
| 024F | 014F | 013M   | 1995 | 1998 | Soda Butte | 0 | 1  | Yes | YNP founder | 252  |
| 043M | 014F | 013M   | 1996 | 1999 | Soda Butte | 0 | 0  | Yes |             | 255  |
| 044F | 014F | 013M   | 1996 | 2005 | Soda Butte | 0 | 0  | Yes |             | 256  |
| 045F | 014F | 013M   | 1996 | 1996 | Soda Butte | 0 | 0  | Yes |             | 257  |
| 123M | 014F | 013M   | 1997 | 1999 | Soda Butte | 0 | 0  | Yes |             | 276  |

|      |      |      |      |      |                |      |   |     |      |
|------|------|------|------|------|----------------|------|---|-----|------|
| 124M | 014F |      | 1997 | 2000 | Soda Butte     | 0    | 0 | Yes | 8750 |
| 126F | 014F | 013M | 1997 | 2009 | Soda Butte     | 0    | 7 | Yes | 1261 |
| 240M | 016F | 165M | 0    | 2003 | Sheep Mountain | 0.06 | 0 | Yes | 304  |
| 052M | 016F | 008M | 1996 | 2003 | Rose Creek     | 0    | 0 |     | 052M |
| 078F | 016F | 008M | 1997 | 1999 | Rose Creek     | 0    | 0 | Yes | 267  |
| 085F | 016F | 008M | 1997 | 1998 | Rose Creek     | 0    | 0 | Yes | 7927 |
| 108M | 016F | 034M | 1997 | 1997 | Chief Joseph   | 0    | 0 |     | 273  |
| 111F | 016F | 034M | 1997 | 1998 | Chief Joseph   | 0    | 0 | Yes | 274  |
| 167F | 016F | 165M | 1998 | 1999 | Sheep Mountain | 0.06 | 0 |     | 167F |
| 168F | 016F | 165M | 1998 | 1999 | Sheep Mountain | 0.06 | 0 | Yes | 279  |
| 188F | 016F | 165M | 1998 | 2000 | Sheep Mountain | 0.06 | 0 | Yes | 576  |
| 195M | 016F | 165M | 1998 | 2001 | Sheep Mountain | 0.06 | 0 |     | 195M |
| 196M | 016F | 165M | 1998 | 2001 | Sheep Mountain | 0.06 | 0 | Yes | 367  |
| 182M | 016F | 165M | 1999 | 1999 | Sheep Mountain | 0.06 | 0 | Yes | 4666 |
| 183F | 016F | 165M | 1999 | 1999 | Sheep Mountain | 0.06 | 0 | Yes | 4671 |
| 184F | 016F | 165M | 1999 | 1999 | Sheep Mountain | 0.06 | 0 | Yes | 702  |
| 189M | 016F | 165M | 1999 | 2001 | Sheep Mountain | 0.06 | 0 | Yes | 704  |
| 197F | 016F | 165M | 1999 | 2000 | Sheep Mountain | 0.06 | 0 | Yes | 1527 |
| 113M | 017F | 034M | 1997 |      | Chief Joseph   | 0    | 7 |     | 630  |
| 147M | 017F | 034M | 1997 | 2000 | Chief Joseph   | 0    | 1 | Yes | 693  |
| 204M | 017F | 034M | 1997 | 2005 | Chief Joseph   | 0    | 2 |     | 204M |
| 206M | 017F | 034M | 1997 | 2004 | Chief Joseph   | 0    | 4 | Yes | 282  |
| 077F | 018F | 008M | 1997 | 2000 | Rose Creek     | 0    | 0 | Yes | 266  |

|      |      |      |      |      |            |      |   |     |             |      |
|------|------|------|------|------|------------|------|---|-----|-------------|------|
| 082M | 018F | 008M | 1997 | 1999 | Rose Creek | 0    | 0 | Yes |             | 268  |
| 083M | 018F | 008M | 1997 | 1998 | Rose Creek | 0    | 0 | Yes |             | 269  |
| 192M | 018F | 008M | 1997 | 2009 | Rose Creek | 0    | 1 | Yes |             | 372  |
| 193M | 018F | 008M | 1997 |      | Rose Creek | 0    | 7 |     |             | 417  |
| 194M | 018F | 008M | 1997 | 2004 | Rose Creek | 0    | 1 |     |             | 194M |
| 208M | 018F | 008M | 1997 | 2003 | Rose Creek | 0    | 0 |     |             | 160  |
| 153F | 018F | 008M | 1998 | 1999 | Rose Creek | 0    | 0 | Yes |             | 690  |
| 154F | 018F | 008M | 1998 | 2000 | Rose Creek | 0    | 0 | Yes |             | 7885 |
| 156F | 018F | 008M | 1998 | 2000 | Rose Creek | 0    | 0 | Yes |             | 696  |
| 160F | 018F | 008M | 1998 | 1999 | Rose Creek | 0    | 0 | Yes |             | 697  |
| 162M | 018F | 008M | 1998 | 2002 | Rose Creek | 0    | 0 | Yes |             | 699  |
| 271F | 018F | 008M | 1998 | 2006 | -          | 0    | 2 | Yes |             | 324  |
| 190F | 018F | 008M | 1999 | 2004 | Rose Creek | 0    | 0 | Yes |             | 371  |
| 260F | 018F | 207M | 2001 | 2003 | Rose Creek | 0.06 | 0 | Yes |             | 321  |
| 228F | 024F |      | 1999 |      | Teton      | 0    | 0 |     |             | 228F |
| 229M | 024F |      | 1999 | 2001 | Teton      | 0    | 0 | Yes |             | 301  |
| 026F | 027F | 028M | 1995 | 1996 | Nez Perce  | 0    | 0 | Yes | YNP founder | 622  |
| 029M | 027F | 028M | 1995 | 1998 | Nez Perce  | 0    | 2 | Yes | YNP founder | 7855 |
| 030F | 027F | 028M | 1995 | 1998 | Nez Perce  | 0    | 1 |     | YNP founder | 625  |
| 037F | 027F | 028M | 1995 | 1997 | Nez Perce  | 0    | 1 | Yes | YNP founder | 254  |
| 047M | 027F | 028M | 1996 | 1996 | Nez Perce  | 0    | 0 |     |             | 047M |
| 048F | 027F | 028M | 1996 | 2005 | Nez Perce  | 0    | 6 | Yes |             | 258  |
| 128M | 030F | 035M | 1997 | 1998 | Thorofare  | 0    | 0 | Yes |             | 277  |

|      |      |        |      |      |              |      |   |     |             |      |
|------|------|--------|------|------|--------------|------|---|-----|-------------|------|
| 129F | 030F | 035M   | 1997 | 2000 | Thorofare    | 0    | 0 |     |             | 129F |
| 277F | 033F | 034M   | 0    | 2002 | Chief Joseph | 0    | 0 |     |             | 277F |
| 115F | 033F | 034M   | 1998 | 1999 | Chief Joseph | 0    | 0 | Yes |             | 692  |
| 185M | 033F | 034M   | 1999 | 1999 | Chief Joseph | 0    | 0 | Yes |             | 5299 |
| 186M | 033F | 034M   | 1999 | 1999 | Chief Joseph | 0    | 0 | Yes |             | 4668 |
| 187F | 033F | 034M   | 1999 | 2000 | Chief Joseph | 0    | 0 | Yes |             | 700  |
| 201F | 033F | 034M   | 1999 | 2001 | Chief Joseph | 0    | 0 | Yes |             | 7913 |
| 202M | 033F | 034M   | 2000 | 2002 | Chief Joseph | 0    | 0 |     |             | 202M |
| 203M | 033F | 034M   | 2000 | 2001 | Chief Joseph | 0    | 0 | Yes |             | 5413 |
| 205M | 033F | 034M   | 2000 | 2004 | Chief Joseph | 0    | 1 | Yes |             | 1529 |
| 248M | 033F | 034M   | 2001 | 2002 | Chief Joseph | 0    | 0 | Yes |             | 311  |
| 058F | 036F | 035M   | 1996 | 1996 | Lone Star    | 0    | 0 | Yes |             | 261  |
| 092M | 037F | 029M   | 1997 | 2001 | Nez Perce    | 0.25 | 0 |     |             | 092M |
| 040F | 039F | Canada | 1995 | 2000 | Druid Peak   | 0    | 2 | Yes | YNP founder | 369  |
| 041F | 039F | Canada | 1995 | 1997 | Druid Peak   | 0    | 2 | Yes | YNP founder | 8787 |
| 042F | 039F | Canada | 1995 | 2004 | Druid Peak   | 0    | 5 | Yes | YNP founder | 629  |
| 199M | 040F | 021M   | 1999 | 2000 | -            | 0    | 0 | Yes |             | 4669 |
| 217F | 040F | 021M   | 2000 | 2004 | Druid Peak   | 0    | 1 | Yes |             | 291  |
| 218F | 040F | 021M   | 2000 | 2002 | Druid Peak   | 0    | 0 | Yes |             | 292  |
| 221M | 040F | 021M   | 2000 | 2002 | Druid Peak   | 0    | 0 | Yes |             | 221M |
| 251F | 040F | 021M   | 2000 | 2003 | Druid Peak   | 0    | 2 | Yes |             | 313  |
| 472F | 040F | 021M   | 2000 | 2010 | Druid Peak   | 0    | 7 | Yes |             | 378  |
| 103F | 041F | 038M   | 1997 | 2004 | Druid Peak   | 0    | 1 | Yes |             | 271  |

|      |      |      |      |      |                |      |   |     |      |
|------|------|------|------|------|----------------|------|---|-----|------|
| 422F | 041F |      | 2003 | 2004 | Druid Peak     | 0    | 0 |     | 7623 |
| 105F | 042F | 038M | 1997 | 2003 | Druid Peak     | 0    | 1 | Yes | 7877 |
| 106F | 042F | 038M | 1997 | 2005 | Druid Peak     | 0    | 4 | Yes | 272  |
| 104M | 042F | 038M | 1997 | 2000 | Druid Peak     | 0    | 0 | Yes | 226  |
| 163M | 042F | 021M | 1998 | 2000 | -              | 0    | 0 |     | 163M |
| 216F | 042F | 021M | 2000 | 2002 | Druid Peak     | 0    | 0 | Yes | 290  |
| 254M | 042F | 021M | 2000 | 2002 | Druid Peak     | 0    | 0 | Yes | 316  |
| 386F | 042F | 021M | 2000 | 2004 | -              | 0    | 1 | Yes | 1528 |
| 255F | 042F | 021M | 2001 | 2005 | Druid Peak     | 0    | 1 | Yes | 151  |
| 424M | 042F | 021M | 2001 | 2004 | Druid Peak     | 0    | 2 |     | 366  |
| 350M | 042F | 021M | 2003 | 2004 | Druid Peak     | 0    | 0 | Yes | 346  |
| 627M | 042F | 021M | 2003 | 2008 | Druid Peak     | 0    | 4 | Yes | 1268 |
| 212F | 048F | 029M | 1998 | 2001 | Nez Perce      | 0.25 | 1 | Yes | 287  |
| 191M | 048F | 072M | 1999 | 2001 | Nez Perce      | 0    | 0 | Yes | 705  |
| 215M | 048F | 072M | 2000 | 2002 | Nez Perce      | 0    | 0 | Yes | 289  |
| 249M | 048F | 072M | 2000 | 2002 | Nez Perce      | 0    | 0 | Yes | 312  |
| 340F | 048F | 072M | 2000 |      | Nez Perce      | 0    | 1 |     | 340F |
| 534M | 048F | 072M | 2000 | 2008 | Nez Perce      | 0    | 7 | Yes | 5501 |
| 540F | 048F | 072M | 2000 | 2007 | Nez Perce      | 0    | 2 | Yes | 411  |
| 305M | 048F | 072M | 2002 | 2005 | Nez Perce      | 0    | 0 | Yes | 340  |
| 306F | 048F | 072M | 2002 |      | Nez Perce      | 0    | 0 |     | 306F |
| 341F | 048F | 072M | 2002 | 2008 | Nez Perce      | 0    | 0 | Yes | 659  |
| 537F | 048F | 072M | 2002 | 2009 | Gibbon Meadows | 0    | 7 | Yes | 1279 |

|       |       |       |      |      |                   |      |   |     |      |
|-------|-------|-------|------|------|-------------------|------|---|-----|------|
| 342F  | 048F  | 072M  | 2003 | 2004 | Nez Perce         | 0    | 0 |     | 587  |
| 467M  | 048F  | 072M  | 2003 | 2004 | Nez Perce         | 0    | 0 | Yes | 374  |
| 476F  | 048F  | 072M  | 2003 | 2005 | Nez Perce         | 0    | 0 |     | 476F |
| 484M  | 048F  | 072M  | 2004 | 2005 | Nez Perce         | 0    | 0 | Yes | 386  |
| 485F  | 048F  | 072M  | 2004 | 2006 | Nez Perce         | 0    | 1 | Yes | 387  |
| 486F  | 048F  | 072M  | 2004 | 2011 | Nez Perce         | 0    | 6 | Yes | 388  |
| 381M  | 103F  | 296M  | 2002 | 2005 | Leopold           | 0    | 1 | Yes | 358  |
| 219M  | 105F  | 021M  | 2000 | 2005 | Druid Peak        | 0    | 0 |     | 293  |
| 253M  | 105F  | 021M  | 2000 | 2005 | Druid Peak        | 0    | 0 | Yes | 315  |
| 353F  | 105F  | 021M  | 2000 | 2007 | Druid Peak        | 0    | 2 | Yes | 349  |
| 222M  | 106F  | 021M  | 2000 | 2001 | Druid Peak        | 0    | 0 | Yes | 296  |
| 224M  | 106F  | 021M  | 2000 | 2002 | Druid Peak        | 0    | 1 | Yes | 297  |
| 351M  | 106F  | 294M  | 2002 | 2004 | Geode Creek       | 0    | 0 |     | 347  |
| 391F  | 106F  | 294M  | 2002 | 2005 | Druid Peak        | 0    | 0 | Yes | 364  |
| 392M  | 106F  | 294M  | 2002 | 2004 | Geode Creek       | 0    | 0 | Yes | 365  |
| 483F  | 106F  | 294M  | 2003 | 2005 | Geode Creek       | 0    | 0 | Yes | 385  |
| 488M  | 106F  | 227M  | 2004 | 2005 | Geode Creek       | 0    | 0 | Yes | 4772 |
| 498F  | 106F  | 227M  | 2004 | 2005 | Geode Creek       | 0    | 0 | Yes | 395  |
| 1104F | 1091F | 1015M | 2017 | 2018 | Wapiti Lake       | 0.02 | 0 | Yes | 9581 |
| 831F  | 1093F | 712M  | 2011 | 2013 | Canyon            | 0.05 | 0 | Yes | 5389 |
| 225M  | 126F  | 120M  | 2000 | 2001 | Yellowstone Delta | 0    | 0 | Yes | 225M |
| 226M  | 126F  | 120M  | 2000 | 2001 | Yellowstone Delta | 0    | 0 | Yes | 7894 |
| 227M  | 126F  | 120M  | 2000 | 2005 | Yellowstone Delta | 0    | 1 | Yes | 299  |



|      |      |      |      |      |                   |      |   |     |      |
|------|------|------|------|------|-------------------|------|---|-----|------|
| 245M | 126F | 243M | 2001 | 2001 | Yellowstone Delta | 0    | 0 | Yes | 308  |
| 246M | 126F | 243M | 2001 | 2001 | Yellowstone Delta | 0    | 0 | Yes | 309  |
| 247M | 126F | 243M | 2001 | 2001 | Yellowstone Delta | 0    | 0 | Yes | 310  |
| 572F | 126F |      | 2001 | 2007 | Yellowstone Delta | 0    | 0 | Yes | 678  |
| 542F | 126F |      | 2003 | 2006 | Yellowstone Delta | 0    | 0 | Yes | 5415 |
| 493M | 126F |      | 2004 | 2005 | Yellowstone Delta | 0    | 0 | Yes | 662  |
| 659M | 126F |      | 2004 | 2008 | Yellowstone Delta | 0    | 0 | Yes | 1251 |
| 634F | 126F |      | 2006 | 2008 | Yellowstone Delta | 0    | 0 | Yes | 1253 |
| 635F | 126F |      | 2006 | 2008 | Yellowstone Delta | 0    | 0 | Yes | 1270 |
| 660F | 126F |      | 2006 | 2008 | Yellowstone Delta | 0    | 0 | Yes | 1254 |
| 633F | 126F |      | 2007 | 2014 | Yellowstone Delta | 0    | 1 | Yes | 1267 |
| 713F | 126F |      | 2007 | 2009 | Yellowstone Delta | 0    | 0 | Yes | 1487 |
| 257M | 151F | 303M | 2001 | 2005 | Cougar Creek      | 0.09 | 0 | Yes | 318  |
| 482M | 151F | 303M | 2001 | 2010 | Cougar Creek      | 0.09 | 5 | Yes | 482M |
| 538M | 151F | 303M | 2001 | 2007 | Cougar Creek      | 0.09 | 0 | Yes | 409  |
| 291M | 151F | 303M | 2002 | 2004 | Cougar Creek      | 0.09 | 0 | Yes | 330  |
| 388F | 151F | 303M | 2002 | 2005 | Cougar Creek      | 0.09 | 0 | Yes | 361  |
| 389M | 151F | 303M | 2002 | 2004 | Cougar Creek      | 0.09 | 2 | Yes | 362  |
| 479M | 151F | 303M | 2002 | 2005 | Cougar Creek      | 0.09 | 0 | Yes | 384  |
| 477M | 151F | 303M | 2003 | 2005 | Cougar Creek      | 0.09 | 0 | Yes | 382  |
| 478F | 151F | 303M | 2003 | 2015 | Cougar Creek      | 0.09 | 4 | Yes | 478F |
| 546M | 151F | 303M | 2004 | 2006 | Cougar Creek      | 0.09 | 0 | Yes | 412  |
| 632F | 151F | 303M | 2004 | 2009 | Cougar Creek      | 0.09 | 0 |     | 1272 |

|            |      |      |      |      |              |      |   |     |        |
|------------|------|------|------|------|--------------|------|---|-----|--------|
| 636M       | 151F | 303M | 2007 | 2011 | Cougar Creek | 0.09 | 2 | Yes | 1274   |
| SW798<br>M | 151F | 303M | 2009 | 2010 | Cougar Creek | 0.09 | 0 |     | SW798M |
| SW804<br>M | 151F | 303M | 2009 | 2010 | Cougar Creek | 0.09 | 0 |     | SW804M |
| 541M       | 152F | 206M | 2000 | 2007 | Swan Lake    | 0.03 | 2 | Yes | 404    |
| 292M       | 152F | 206M | 2001 | 2004 | Swan Lake    | 0.03 | 1 | Yes | 292M   |
| 347M       | 152F | 204M | 2002 | 2003 | Swan Lake    | 0.03 | 0 | Yes | 589    |
| 355F       | 152F | 206M | 2002 | 2005 | Swan Lake    | 0.03 | 0 | Yes | 156    |
| 515U       | 152F |      | 2005 | 2005 | Swan Lake    | 0    | 0 |     | 515U   |
| 387U       | 174F | 193M | 1999 | 2001 | Mollie's     | 0    | 0 |     | 387U   |
| 263M       | 174F | 193M | 2000 |      | Mollie's     | 0    | 0 |     | 1517   |
| 378M       | 174F | 193M | 2000 |      | Mollie's     | 0    | 0 |     | 378M   |
| 261M       | 174F | 194M | 2001 | 2004 | Mollie's     | 0    | 2 | Yes | 322    |
| 264F       | 174F | 193M | 2001 | 2002 | -            | 0    | 0 |     | 581    |
| 377M       | 174F | 193M | 2001 | 2006 | Mollie's     | 0    | 2 | Yes | 355    |
| 379M       | 174F | 193M | 2001 | 2005 | Mollie's     | 0    | 0 | Yes | 356    |
| 489M       | 174F | 193M | 2001 | 2006 | Mollie's     | 0    | 1 | Yes | 489M   |
| 490M       | 174F | 193M | 2001 | 2006 | Mollie's     | 0    | 2 | Yes | 391    |
| 586M       | 174F | 193M | 2002 | 2011 | Mollie's     | 0    | 1 | Yes | 7928   |
| 587M       | 174F | 193M | 2002 | 2011 | Mollie's     | 0    | 1 | Yes | 681    |
| 343M       | 174F | 193M | 2003 | 2005 | Mollie's     | 0    | 0 | Yes | 342    |
| 495M       | 174F | 193M | 2003 | 2011 | Mollie's     | 0    | 6 | Yes | 1485   |
| 496F       | 174F | 193M | 2004 | 2005 | Mollie's     | 0    | 0 | Yes | 8753   |

|      |      |      |      |      |              |      |   |     |      |
|------|------|------|------|------|--------------|------|---|-----|------|
| 497M | 174F | 193M | 2004 | 2007 | Mollie's     | 0    | 0 | Yes | 7901 |
| 528M | 209F | 534M | 2003 | 2006 | Leopold      | 0    | 0 | Yes | 403  |
| 591F | 209F | 534M | 2006 | 2008 | Leopold      | 0    | 0 | Yes | 683  |
| 593F | 209F | 534M | 2006 | 2008 | Leopold      | 0    | 0 | Yes | 8754 |
| 623M | 209F | 534M | 2007 | 2008 | Leopold      | 0    | 0 |     | 1277 |
| 624F | 209F | 534M | 2007 | 2008 | Leopold      | 0    | 0 | Yes | 1260 |
| 252M | 212F | 072M | 2000 | 2002 | Nez Perce    | 0    | 0 | Yes | 314  |
| 309F | 212F | 072M | 2000 | 2003 | Nez Perce    | 0    | 0 | Yes | 586  |
| 453M | 217F | 261M | 2003 | 2005 | Slough Creek | 0.03 | 0 | Yes | 5497 |
| 344F | 220F |      | 2002 | 2007 | Leopold      | 0    | 1 | Yes | 343  |
| 239M | 233F | 147M | 2001 |      | -            | 0    | 0 | Yes | 303  |
| 295M | 251F | 113M | 2002 | 2007 | Agate Creek  | 0.06 | 5 | Yes | 334  |
| 361M | 251F | 301M | 2003 | 2003 | -            | 0.03 | 0 | Yes | 590  |
| 349M | 255F | 302M | 2003 | 2005 | Druid Peak   | 0.03 | 0 | Yes | 345  |
| 480M | 259F | 534M | 2003 | 2010 | Leopold      | 0    | 3 | Yes | 4773 |
| 307M | 271F | 424M | 2000 | 2003 | Mill Creek   | 0.06 | 0 | Yes | 584  |
| 308F | 271F | 424M | 2002 | 2003 | Mill Creek   | 0.06 | 0 | Yes | 585  |
| 435U | 286F | 021M | 2004 | 2004 | -            | 0.12 | 0 |     | 435U |
| 382F | 288F | 534M | 2003 | 2004 | Leopold      | 0    | 0 | Yes | 359  |
| 468M | 288F | 534M | 2003 | 2007 | Leopold      | 0    | 0 | Yes | 4774 |
| 469F | 288F | 534M | 2003 | 2012 | Leopold      | 0    | 4 | Yes | 375  |
| 536F | 288F | 534M | 2003 | 2009 | Leopold      | 0    | 3 | Yes | 407  |
| 507U | 288F | 534M | 2005 | 2005 | Leopold      | 0    | 0 |     | 507U |

|      |      |        |      |      |               |      |   |     |      |
|------|------|--------|------|------|---------------|------|---|-----|------|
| 508U | 288F | 534M   | 2005 | 2005 | Leopold       | 0    | 0 |     | 508U |
| 466U | 340F |        | 2004 | 2004 | Biscuit Basin | 0    | 0 | Yes | 466U |
| 474M | 340F |        | 2004 | 2005 | Biscuit Basin | 0    | 0 | Yes | 380  |
| 475F | 340F |        | 2004 | 2005 | Biscuit Basin | 0    | 0 | Yes | 381  |
| 670U | 344F |        | 2007 | 2008 | -             | 0    | 0 |     | 1519 |
| 352M | 353F | 294M   | 2002 | 2003 | Druid Peak    | 0    | 0 | Yes | 348  |
| 568U | 353F | 287M   | 2006 | 2006 | Hellroaring   | 0.09 | 0 |     | 568U |
| 502U | 380F | 377M   | 2004 | 2004 | Slough Creek  | 0.12 | 0 |     | 502U |
| 526F | 380F | 377M   | 2004 | 2008 | Slough Creek  | 0.12 | 0 |     | 401  |
| 631F | 380F | 615M   | 2007 | 2008 | Slough Creek  | 0.02 | 0 |     | 1271 |
| 976F | 380F | 615M   | 2007 | 2015 | Slough Creek  | 0.02 | 1 | Yes | 5882 |
| 286F | 386F | 214M   | 2002 |      | Druid Peak    | 0    | 1 |     | 326  |
| 523F | 469F | 381M   | 2005 | 2008 | Leopold       | 0.06 | 0 | Yes | 523F |
| 639M | 469F | SW147M | 2006 | 2008 | Hayden Valley | 0.02 | 0 | Yes | 1278 |
| 821F | 469F | 695M   | 2009 | 2017 | Quadrant      | 0.01 | 1 | Yes | 5874 |
| 871M | 469F | 295M   | 2010 | 2014 | -             | 0.02 | 1 | Yes | 5394 |
| 733F | 470F | 627M   | 2006 | 2009 | Oxbow Creek   | 0.05 | 0 | Yes | 1515 |
| 524F | 471F | 113M   | 2005 | 2007 | Agate Creek   | 0.03 | 0 | Yes | 408  |
| 643F | 471F | 383M   | 2007 | 2008 | Agate Creek   | 0.02 | 0 | Yes | 1259 |
| 644F | 471F | 383M   | 2007 | 2008 | Agate Creek   | 0.02 | 0 | Yes | 1265 |
| 715F | 471F | 383M   | 2007 | 2011 | Agate Creek   | 0.02 | 0 | Yes | 1489 |
| 384F | 472F | 113M   | 2003 |      | Agate Creek   | 0.06 | 0 |     | 5591 |
| 385M | 472F | 113M   | 2003 |      | Agate Creek   | 0.06 | 0 |     | 5592 |

|            |      |      |      |      |              |      |   |     |      |
|------------|------|------|------|------|--------------|------|---|-----|------|
| 471F       | 472F |      | 2003 | 2012 | Agate Creek  | 0    | 2 | Yes | 7898 |
| 525F       | 472F | 113M | 2004 | 2008 | Agate Creek  | 0.06 | 0 | Yes | 400  |
| SW147<br>M | 472F | 113M | 2004 | 2010 | Agate Creek  | 0.06 | 1 | Yes | 7912 |
| 615M       | 472F | 113M | 2005 | 2007 | Agate Creek  | 0.06 | 3 |     | 1257 |
| 590M       | 472F | 113M | 2006 | 2008 | Agate Creek  | 0.06 | 0 | Yes | 682  |
| 692F       | 472F | 113M | 2006 | 2011 | Agate Creek  | 0.06 | 2 | Yes | 1507 |
| 693F       | 472F | 113M | 2006 | 2013 | Agate Creek  | 0.06 | 2 | Yes | 1495 |
| 832F       | 472F | 113M | 2006 | 2012 | Agate Creek  | 0.06 | 2 |     | 832F |
| 642F       | 472F | 383M | 2007 | 2011 | Agate Creek  | 0.03 | 0 | Yes | 1266 |
| 775M       | 472F | 641M | 2010 | 2011 | Agate Creek  | 0.02 | 0 | Yes | 7903 |
| 757F       | 478F | 689M | 2009 | 2013 | Cougar Creek | 0.15 | 0 | Yes | 5373 |
| 910M       | 478F | 689M | 2009 | 2018 | Cougar Creek | 0.15 | 0 | Yes | 5871 |
| 825F       | 478F | 689M | 2011 | 2012 | Cougar Creek | 0.15 | 0 | Yes | 5383 |
| 962M       | 478F | 689M | 2011 | 2019 | Cougar Creek | 0.15 | 1 |     | 8764 |
| 953F       | 478F | 689M | 2013 | 2018 | Cougar Creek | 0.15 | 1 | Yes | 953F |
| 1204F      | 478F | 689M | 2014 |      | -            | 0.15 | 0 |     | 7921 |
| 754M       | 485F |      | 2008 | 2012 | 755M Group   | 0    | 1 | Yes | 1504 |
| 755M       | 485F |      | 2008 | 2017 | 755M Group   | 0    | 4 | Yes | 1502 |
| 712M       | 486F | 193M | 2006 | 2017 | Mollie's     | 0    | 2 | Yes | 5418 |
| 640F       | 486F | 586M | 2007 | 2010 | Mollie's     | 0    | 1 | Yes | 1280 |
| 641M       | 486F | 586M | 2007 | 2011 | Mollie's     | 0    | 1 | Yes | 1273 |
| 686F       | 486F | 586M | 2007 | 2013 | Mollie's     | 0    | 0 | Yes | 7856 |

|      |      |      |      |      |                |      |   |     |      |
|------|------|------|------|------|----------------|------|---|-----|------|
| 870F | 486F | 587M | 2008 | 2015 | Mollie's       | 0    | 2 | Yes | 5392 |
| 812M | 486F | 495M | 2009 | 2011 | Mollie's       | 0    | 0 | Yes | 4665 |
| 779F | 486F | 495M | 2010 | 2018 | Mollie's       | 0    | 3 | Yes | 7906 |
| 970F | 486F | 495M | 2010 | 2016 | -              | 0    | 2 | Yes | 8771 |
| 823F | 486F | 495M | 2011 | 2012 | Mollie's       | 0    | 0 | Yes | 5381 |
| 824M | 486F | 495M | 2011 | 2012 | Mollie's       | 0    | 0 | Yes | 5382 |
| 889F | 486F | 495M | 2011 | 2014 | Junction Butte | 0    | 0 | Yes | 5422 |
| 949M | 486F | 495M | 2011 | 2017 | -              | 0    | 0 | Yes | 9074 |
| 621F | 527F | 490M | 2005 | 2007 | Slough Creek   | 0.25 | 0 | Yes | 2056 |
| 716F | 527F | 490M | 2005 | 2009 | Slough Creek   | 0.25 | 0 | Yes | 1490 |
| 618F | 527F | 615M | 2007 | 2007 | Slough Creek   | 0.02 | 0 |     | 618F |
| 620M | 527F | 615M | 2007 | 2007 | Slough Creek   | 0.02 | 0 | Yes | 1255 |
| 589F | 536F | 627M | 2006 | 2008 | Oxbow Creek    | 0.02 | 0 | Yes | 7929 |
| 628M | 536F | 627M | 2006 | 2008 | Oxbow Creek    | 0.02 | 0 |     | 628M |
| 626F | 536F | 627M | 2007 | 2008 | Oxbow Creek    | 0.02 | 0 | Yes | 1264 |
| 672U | 536F | 627M | 2008 | 2008 | -              | 0.02 | 0 |     | 672U |
| 451F | 537F | 256M | 2004 | 2004 | Gibbon Meadows | 0    | 0 | Yes | 599  |
| 481M | 537F | 256M | 2004 | 2006 | Gibbon Meadows | 0    | 0 | Yes | 166  |
| 539F | 537F | 482M | 2005 | 2009 | Gibbon Meadows | 0    | 0 | Yes | 410  |
| 794F | 537F | 482M | 2005 | 2012 | Gibbon Meadows | 0    | 2 | Yes | 5314 |
| 577M | 537F | 482M | 2006 | 2008 | Gibbon Meadows | 0    | 0 | Yes | 679  |
| 578F | 537F | 482M | 2006 |      | Gibbon Meadows | 0    | 0 |     | 680  |
| 689M | 537F | 482M | 2006 | 2014 | Gibbon Meadows | 0    | 4 | Yes | 1493 |

|       |      |      |      |      |                |      |   |     |      |
|-------|------|------|------|------|----------------|------|---|-----|------|
| 646F  | 537F | 482M | 2007 | 2009 | Gibbon Meadows | 0    | 0 | Yes | 1269 |
| 647M  | 537F | 482M | 2007 | 2011 | Gibbon Meadows | 0    | 0 | Yes | 1276 |
| 687M  | 537F | 482M | 2008 | 2009 | Gibbon Meadows | 0    | 0 | Yes | 7618 |
| 688M  | 537F |      | 2008 | 2010 | Gibbon Meadows | 0    | 0 | Yes | 1492 |
| 729M  | 537F | 482M | 2008 | 2009 | Gibbon Meadows | 0    | 0 | Yes | 1522 |
| 769M  | 537F | 482M | 2008 | 2010 | Gibbon Meadows | 0    | 0 | Yes | 1509 |
| 768F  | 537F | 482M | 2009 | 2010 | Gibbon Meadows | 0    | 0 | Yes | 5375 |
| 1093F | 540F | 541M | 2006 | 2017 | -              | 0    | 1 | Yes | 8782 |
| 622F  | 540F | 541M | 2007 | 2007 | Hayden Valley  | 0    | 0 | Yes | 5302 |
| 1116U | 545F |      | 2011 | 2018 | -              | 0    | 0 |     | 9587 |
| 570M  | 569F | 302M | 2006 | 2007 | Druid Peak     | 0.03 | 0 | Yes | 676  |
| 571F  | 569F | 480M | 2006 | 2010 | Druid Peak     | 0.02 | 0 | Yes | 677  |
| 629M  | 569F | 480M | 2006 | 2008 | Druid Peak     | 0.02 | 0 | Yes | 1262 |
| 691F  | 569F | 480M | 2006 | 2010 | Druid Peak     | 0.02 | 0 | Yes | 1494 |
| 694F  | 569F | 480M | 2006 | 2009 | Druid Peak     | 0.02 | 0 | Yes | 1496 |
| 756F  | 569F | 480M | 2006 | 2010 | Druid Peak     | 0.02 | 0 | Yes | 1511 |
| 645F  | 569F | 480M | 2007 | 2009 | Druid Peak     | 0.02 | 0 | Yes | 1275 |
| 734M  | 569F | 480M | 2007 | 2009 | Druid Peak     | 0.02 | 0 | Yes | 1512 |
| 761F  | 569F | 480M | 2007 | 2010 | Druid Peak     | 0.02 | 0 | Yes | 1525 |
| 778M  | 569F | 480M | 2007 | 2015 | Druid Peak     | 0.02 | 1 | Yes | 7905 |
| 815M  | 569F | 480M | 2007 | 2012 | Druid Peak     | 0.02 | 2 |     | 815M |
| 838M  | 569F | 480M | 2007 | 2012 | Druid Peak     | 0.02 | 1 | Yes | 7867 |
| 690F  | 569F | 480M | 2008 | 2010 | Druid Peak     | 0.02 | 0 | Yes | 7617 |

|       |      |        |      |      |                   |      |   |     |                                        |
|-------|------|--------|------|------|-------------------|------|---|-----|----------------------------------------|
| 676M  | 588F | 295M   | 2008 | 2008 | -                 | 0    | 0 | Yes | 1518                                   |
| 872F  | 633F | 760M   | 2011 | 2014 | Yellowstone Delta | 0    | 0 | Yes | 5395                                   |
| 758M  | 640F | 495M   | 2009 | 2013 | Mollie's          | 0.12 | 0 | Yes | 5374                                   |
| 822F  | 640F | 495M   | 2009 | 2012 | Mollie's          | 0.12 | 0 | Yes | 5380                                   |
| 777M  | 692F | 815M   | 2010 | 2012 | Blacktail         | 0.05 | 0 | Yes | 8759                                   |
| 810F  | 692F | 778M   | 2010 | 2011 | Blacktail         | 0.05 | 0 | Yes | 4661                                   |
| 752F  | 693F | 302M   | 2009 | 2012 | Blacktail         | 0.03 | 0 | Yes | 5372                                   |
| 830F  | 693F | 302M   | 2009 | 2012 | Blacktail         | 0.03 | 0 | Yes | 5388                                   |
| 911M  | 693F | 815M   | 2010 | 2016 | Blacktail         | 0.05 | 3 | Yes | 7931                                   |
| 763F  | 696F | 614M   | 2007 | 2012 | Madison           | 0    | 0 | Yes | 1500                                   |
| 924F  | 779F |        | 2013 | 2014 | Mollie's          | 0    | 0 | Yes | 7924                                   |
| 978F  | 779F |        | 2013 | 2018 | Mollie's          | 0    | 0 | Yes | 5369                                   |
| 1014M | 779F |        | 2013 | 2018 | -                 | 0    | 0 | Yes | 5870                                   |
| 979F  | 779F |        | 2014 | 2015 | Mollie's          | 0    | 0 | Yes | 5370                                   |
| 1015M | 779F |        | 2014 | 2018 | Mollie's          | 0    | 3 | Yes | 5875                                   |
| 1090F | 779F |        | 2014 | 2018 | -                 | 0    | 0 | Yes | 8779                                   |
| 1118F | 779F |        | 2014 | 2018 | -                 | 0    | 0 | Yes | 9589                                   |
| 1155M | 779F |        | 2014 | 2021 | -                 | 0    | 0 |     | Newly collected in<br>this study 10927 |
| 1013M | 779F |        | 2015 | 2017 | -                 | 0    | 0 | Yes | 5881                                   |
| 772U  | 794F | 754M   | 2009 | 2010 | -                 | 0.06 | 0 | Yes | 5309                                   |
| 819F  | 794F | 636M   | 2010 | 2012 | Mary Mountain     | 0.15 | 0 | Yes | 5377                                   |
| 996M  | 821F | SW763M | 2015 | 2018 | -                 | 0.01 | 0 | Yes | 5877                                   |



|       |      |        |      |      |                |      |   |     |      |
|-------|------|--------|------|------|----------------|------|---|-----|------|
| 1012M | 821F | SW763M | 2015 | 2016 | -              | 0.01 | 0 | Yes | 5873 |
| 1048M | 821F | SW763M | 2015 | 2018 | Junction Butte | 0.01 | 0 | Yes | 8775 |
| 776F  | 832F | 755M   | 2010 | 2014 | Lamar Canyon   | 0    | 0 |     | 776F |
| 820F  | 832F | 755M   | 2011 | 2013 | Lamar Canyon   | 0    | 0 | Yes | 5378 |
| 759F  | 870F | 495M   | 2009 | 2013 | Mollie's       | 0.12 | 0 | Yes | 8758 |
| 961M  | 870F | 890M   | 2014 | 2014 | -              | 0    | 0 | Yes | 5884 |
| 968F  | 870F | 890M   | 2014 | 2015 | Junction Butte | 0    | 0 | Yes | 8769 |
| 995F  | 870F | 890M   | 2014 | 2016 | -              | 0    | 0 | Yes | 5880 |
| 992M  | 909F | SW763M | 2011 | 2016 | -              | 0    | 0 | Yes | 5879 |
| 908F  | 909F | SW763M | 2013 | 2014 | 8 Mile         | 0    | 0 | Yes | 7926 |
| 993M  | 909F | SW763M | 2013 | 2016 | -              | 0    | 0 | Yes | 5872 |
| 963F  | 909F | 871M   | 2014 | 2018 | 8 Mile         | 0    | 1 | Yes | 8765 |
| 964M  | 909F | 871M   | 2014 | 2018 | 8 Mile         | 0    | 0 | Yes | 8766 |
| 966M  | 909F | 871M   | 2014 | 2017 | 8 Mile         | 0    | 0 | Yes | 8767 |
| 1047M | 909F | 871M   | 2014 | 2018 | Junction Butte | 0    | 0 | Yes | 8774 |
| 1005F | 909F |        | 2015 | 2018 | -              | 0    | 0 | Yes | 5878 |
| 1096M | 909F | 962M   | 2017 | 2017 | -              | 0    | 0 | Yes | 8785 |
| 967M  | 926F | 925M   | 2014 | 2015 | Lamar Canyon   | 0    | 0 | Yes | 8768 |
| 1016F | 926F | 925M   | 2015 | 2016 | Lamar Canyon   | 0    | 0 | Yes | 5883 |
| 1050F | 953F |        | 2016 | 2017 | Cougar Creek   | 0    | 0 | Yes | 8777 |
| 1051M | 953F |        | 2016 | 2017 | Cougar Creek   | 0    | 0 | Yes | 8778 |
| 1049F | 963F |        | 2016 | 2018 | 8 Mile         | 0    | 0 | Yes | 8776 |
| 1107M | 963F |        | 2016 | 2019 | -              | 0    | 0 |     | 9584 |

|       |        |        |      |      |                 |      |   |     |                                            |      |
|-------|--------|--------|------|------|-----------------|------|---|-----|--------------------------------------------|------|
| 1108M | 963F   |        | 2016 | 2018 | -               | 0    | 0 | Yes |                                            | 9585 |
| 994M  | 970F   | 911M   | 2015 | 2016 | -               | 0.03 | 0 | Yes |                                            | 5876 |
| 1109F | 970F   | 911M   | 2016 |      | Junction Butte  | 0.03 | 0 |     |                                            | 9586 |
| 977F  | 976F   |        | 2012 | 2015 | -               | 0    | 0 | Yes |                                            | 5868 |
| 013M  | Canada | Canada | 1985 | 1997 | Soda Butte      | 0    | 3 | Yes | Pedigree founder;<br>YNP founder           | 5289 |
| 004M  | Canada | Canada | 1989 | 1996 | Crystal/Mollies | 0    | 2 |     | Pedigree founder;<br>YNP founder           | 004M |
| 027F  | Canada | Canada | 1989 | 1997 | Nez Perce       | 0    | 2 | Yes | Pedigree founder;<br>YNP founder           | 368  |
| 038M  | Canada | Canada | 1989 | 1997 | Druid Peak      | 0    | 2 | Yes | Pedigree founder;<br>YNP founder           | 627  |
| 039F  | Canada | Canada | 1989 | 1998 | Druid Peak      | 0    | 1 |     | Pedigree founder;<br>YNP founder           | 039F |
| 005F  | Canada | Canada | 1990 | 2000 | Crystal/Mollies | 0    | 4 | Yes | Pedigree founder;<br>YNP founder           | 244  |
| 009F  | Canada | Canada | 1990 | 1999 | Rose Creek      | 0    | 3 | Yes | Pedigree founder;<br>YNP founder           | 7861 |
| 010M  | Canada | Canada | 1990 | 1995 | Rose Creek      | 0    | 1 |     | Pedigree founder;<br>YNP founder           | 5290 |
| 011F  | Canada | Canada | 1991 | 1996 | Soda Butte      | 0    | 0 |     | YNP founder                                | 011F |
| 012M  | Canada | Canada | 1991 | 1996 | Soda Butte      | 0    | 0 |     | YNP founder                                | 012M |
| 035M  | Canada | Canada | 1992 | 1998 | Lone Star       | 0    | 2 | Yes | Pedigree founder;<br>YNP founder           | 253  |
| 014F  | Canada | Canada | 1993 | 2000 | Soda Butte      | 0    | 4 | Yes | Pedigree founder;<br>YNP founder           | 229  |
| 028M  | Canada | Canada | 1993 | 1997 | Nez Perce       | 0    | 2 |     | Pedigree founder;<br>YNP founder           | 623  |
| 036F  | Canada | Canada | 1993 | 1996 | Lone Star       | 0    | 1 | Yes | Pedigree founder;<br>YNP founder           | 556  |
| 006M  | Canada | 004M   | 1994 | 1998 | Crystal/Mollies | 0    | 3 | Yes | YNP founder                                | 245  |
| 015M  | Canada | Canada | 1994 | 1996 | Soda Butte      | 0    | 1 | Yes | Pedigree founder;<br>YNP founder           | 555  |
| 034M  | Canada | Y38    | 1994 | 2001 | Chief Joseph    | 0    | 6 | Yes | YNP founder; father<br>is Pedigree founder | 570  |

|      |                |               |      |      |              |   |   |     |                                                  |      |
|------|----------------|---------------|------|------|--------------|---|---|-----|--------------------------------------------------|------|
| 063F | Sawtooth<br>hF | Sawtooth<br>M | 1996 | 1997 | Nez Perce    | 0 | 0 | Yes | YNP founder;<br>parents are Pedigree<br>founders | 262  |
| 064F | Sawtooth<br>hF | Sawtooth<br>M | 1996 | 1997 | Nez Perce    | 0 | 0 | Yes | YNP founder;<br>parents are Pedigree<br>founders | 263  |
| 065F | Sawtooth<br>hF | Sawtooth<br>M | 1996 | 1997 | Nez Perce    | 0 | 0 | Yes | YNP founder;<br>parents are Pedigree<br>founders | 264  |
| 066M | Sawtooth<br>hF | Sawtooth<br>M | 1996 | 1997 | Nez Perce    | 0 | 0 |     | YNP founder;<br>parents are Pedigree<br>founders | 066M |
| 067F | Sawtooth<br>hF | Sawtooth<br>M | 1996 | 1998 | Nez Perce    | 0 | 0 |     | YNP founder;<br>parents are Pedigree<br>founders | 559  |
| 068F | Sawtooth<br>hF | Sawtooth<br>M | 1996 | 1997 | Nez Perce    | 0 | 0 | Yes | YNP founder;<br>parents are Pedigree<br>founders | 560  |
| 069M | Sawtooth<br>hF | Sawtooth<br>M | 1996 | 1997 | Nez Perce    | 0 | 0 | Yes | YNP founder;<br>parents are Pedigree<br>founders | 561  |
| 070M | Sawtooth<br>hF | Sawtooth<br>M | 1996 | 2005 | Nez Perce    | 0 | 0 | Yes | YNP founder;<br>parents are Pedigree<br>founders | 563  |
| 071F | Sawtooth<br>hF | Sawtooth<br>M | 1996 | 1997 | Nez Perce    | 0 | 0 | Yes | YNP founder;<br>parents are Pedigree<br>founders | 265  |
| 072M | Sawtooth<br>hF | Sawtooth<br>M | 1996 | 2003 | Nez Perce    | 0 | 7 | Yes | YNP founder;<br>parents are Pedigree<br>founders | 562  |
| 032F | Y53            | 038M          | 1992 | 1996 | Chief Joseph | 0 | 0 |     | YNP founder; mother<br>is Pedigree founder       | 032F |
| 031M | Y53            | 038M          | 1995 | 1997 | Chief Joseph | 0 | 0 | Yes | YNP founder; mother<br>is Pedigree founder       | 626  |
| 033F | Y53            | 038M          | 1995 | 2001 | Chief Joseph | 0 | 4 | Yes | YNP founder; mother<br>is Pedigree founder       | 154  |
| 285M |                |               |      | 2003 | Lone Bear    | 0 | 0 | Yes |                                                  | 325  |
| 614M |                | 192M          |      | 2007 | Bechler      | 0 | 1 | Yes |                                                  | 5305 |

|      |      |      |      |                   |   |   |     |                  |      |
|------|------|------|------|-------------------|---|---|-----|------------------|------|
| 023M |      | 1995 |      | Rose Creek        | 0 | 0 |     | YNP founder      | 023M |
| 233F | 015M | 1997 |      | Soda Butte        | 0 | 1 |     |                  | 302  |
| 174F |      | 1998 | 2004 | Crystal           | 0 | 7 |     | Pedigree founder | 174F |
| 487M |      | 1998 | 2006 | Yellowstone Delta | 0 | 1 |     | Pedigree founder | 389  |
| 294M |      | 1999 | 2003 | -                 | 0 | 3 | Yes | Pedigree founder | 333  |
| 210M | 303M | 2000 | 2003 | Leopold           | 0 | 0 | Yes |                  | 285  |
| 214M | 072M | 2000 | 2004 | Nez Perce         | 0 | 1 |     |                  | 288  |
| 220F | 303M | 2000 | 2003 | Leopold           | 0 | 1 | Yes |                  | 294  |
| 555F | 021M | 2000 | 2006 | -                 | 0 | 0 |     |                  | 555F |
| 241M | 118M | 2001 | 2002 | Sheep Mountain    | 0 | 1 | Yes |                  | 305  |
| 434F |      | 2001 | 2004 | -                 | 0 | 0 | Yes |                  | 597  |
| 287M | 224M | 2002 | 2007 | Leopold           | 0 | 1 | Yes |                  | 327  |
| 289M | 224M | 2002 | 2003 | Leopold           | 0 | 1 | Yes |                  | 328  |
| 293F | 206M | 2002 | 2004 | Swan Lake         | 0 | 0 | Yes |                  | 332  |
| 356M | 204M | 2002 | 2005 | Swan Lake         | 0 | 0 | Yes |                  | 351  |
| 348M | 302M | 2003 | 2005 | Druid Peak        | 0 | 0 | Yes |                  | 344  |
| 373M | 302M | 2003 |      | Druid Peak        | 0 | 0 |     |                  | 2049 |
| 374M | 302M | 2003 | 2009 | Druid Peak        | 0 | 0 |     |                  | 2050 |
| 375F | 302M | 2003 | 2005 | Druid Peak        | 0 | 0 | Yes |                  | 354  |
| 380F | 489M | 2003 | 2008 | Slough Creek      | 0 | 2 | Yes |                  | 357  |
| 383M | 113M | 2003 | 2010 | Agate Creek       | 0 | 2 | Yes |                  | 7895 |
| 527F | 490M | 2003 | 2009 | -                 | 0 | 2 | Yes |                  | 402  |
| 535M |      | 2003 | 2006 | Leopold           | 0 | 0 | Yes |                  | 406  |

|      |      |      |      |                   |   |   |     |                          |
|------|------|------|------|-------------------|---|---|-----|--------------------------|
| 470F | 295M | 2004 | 2011 | Leopold           | 0 | 1 | Yes | 376                      |
| 473M | 205M | 2004 | 2005 | Swan Lake         | 0 | 0 | Yes | 379                      |
| 491M | 377M | 2004 | 2006 | Slough Creek      | 0 | 0 | Yes | 392                      |
| 492F | 487M | 2004 |      | Yellowstone Delta | 0 | 0 |     | 7920                     |
| 529F | 021M | 2004 | 2006 | Druid Peak        | 0 | 0 | Yes | 405                      |
| 569F | 021M | 2004 | 2009 | Druid Peak        | 0 | 4 | Yes | 7902                     |
| 658M |      | 2004 | 2008 | Yellowstone Delta | 0 | 0 | Yes | 1252                     |
| 685M | 377M | 2004 | 2011 | Slough Creek      | 0 | 1 | Yes | 1491                     |
| 695M | 261M | 2004 | 2011 | -                 | 0 | 1 | Yes | 1497                     |
| 696F |      | 2004 | 2009 | -                 | 0 | 1 | Yes | Pedigree founder<br>1531 |
| 698M | 241M | 2004 | 2008 | -                 | 0 | 0 | Yes | 4664                     |
| 543M | 192M | 2005 | 2007 | Bechler           | 0 | 0 | Yes | 414                      |
| 544M | 192M | 2005 | 2008 | Bechler           | 0 | 0 | Yes | 415                      |
| 545F | 192M | 2005 | 2010 | Bechler           | 0 | 1 | Yes | 416                      |
| 588F | 534M | 2005 | 2008 | Leopold           | 0 | 1 | Yes | 7917                     |
| 613M | 295M | 2005 | 2007 | -                 | 0 | 0 | Yes | 7866                     |
| 625F | 292M | 2006 | 2009 | Leopold           | 0 | 0 | Yes | 1281                     |
| 661M |      | 2006 | 2014 | Butte Creek       | 0 | 0 | Yes | 1499                     |
| 762M | 289M | 2006 | 2012 | -                 | 0 | 0 | Yes | 1510                     |
| 630F | 615M | 2007 | 2008 | Slough Creek      | 0 | 0 | Yes | 1263                     |
| 638M | 495M | 2007 | 2008 | Hayden Valley     | 0 | 0 | Yes | 1258                     |
| 679F |      | 2007 | 2008 | -                 | 0 | 0 | Yes | 1526                     |
| 697M |      | 2007 | 2009 | -                 | 0 | 0 | Yes | 1514                     |

|            |      |      |      |                   |   |   |     |                  |      |
|------------|------|------|------|-------------------|---|---|-----|------------------|------|
| 760M       |      | 2007 | 2014 | Butte Creek       | 0 | 2 | Yes | Pedigree founder | 1508 |
| SW763<br>M | 295M | 2007 | 2017 | 8 Mile            | 0 | 3 | Yes |                  | 8772 |
| 684M       | 685M | 2008 |      | Everts            | 0 | 0 |     |                  | 8755 |
| 753F       |      | 2009 | 2010 | Silver            | 0 | 0 | Yes |                  | 1503 |
| 809F       | 389M | 2009 | 2011 | -                 | 0 | 0 | Yes |                  | 4660 |
| 909F       |      | 2009 | 2017 | Quadrant          | 0 | 5 | Yes | Pedigree founder | 7918 |
| 925M       |      | 2009 | 2015 | -                 | 0 | 2 | Yes | Pedigree founder | 7914 |
| 780M       | 760M | 2010 | 2011 | Yellowstone Delta | 0 | 0 | Yes |                  | 8760 |
| 811F       | 389M | 2010 | 2011 | -                 | 0 | 0 | Yes |                  | 4662 |
| 827M       | 760M | 2010 | 2012 | Yellowstone Delta | 0 | 0 | Yes |                  | 5385 |
| 905M       |      | 2010 | 2013 | Blacktail         | 0 | 0 | Yes |                  | 3185 |
| 808F       |      | 2011 | 2011 | -                 | 0 | 0 | Yes |                  | 4659 |
| 813F       | 712M | 2011 | 2011 | Canyon            | 0 | 0 | Yes |                  | 4663 |
| 818F       | 636M | 2011 | 2012 | Mary Mountain     | 0 | 0 | Yes |                  | 5376 |
| 826F       | 636M | 2011 | 2012 | Mary Mountain     | 0 | 0 | Yes |                  | 5384 |
| 828M       | 760M | 2011 | 2013 | Yellowstone Delta | 0 | 0 | Yes |                  | 5386 |
| 829F       |      | 2011 | 2012 | Blacktail         | 0 | 0 | Yes |                  | 5387 |
| 890M       |      | 2011 | 2018 | Junction Butte    | 0 | 1 | Yes | Pedigree founder | 5398 |
| 926F       | 755M | 2011 | 2018 | Lamar Canyon      | 0 | 2 | Yes |                  | 7915 |
| 869M       | 838M | 2012 | 2014 | -                 | 0 | 0 | Yes |                  | 5396 |
| 906M       | 838M | 2012 | 2014 | -                 | 0 | 0 | Yes |                  | 7922 |
| 907F       | 911M | 2013 | 2018 | Junction Butte    | 0 | 0 | Yes |                  | 7925 |

|       |       |      |      |                |   |   |     |                                           |
|-------|-------|------|------|----------------|---|---|-----|-------------------------------------------|
| 969F  | 911M  | 2013 | 2018 | Junction Butte | 0 | 0 | Yes | 8770                                      |
| 1091F | 755M  | 2015 | 2018 | Wapiti Lake    | 0 | 1 | Yes | 8780                                      |
| 1119F |       | 2016 | 2018 | 8 Mile         | 0 | 0 | Yes | 9910                                      |
| 1094M |       | 2017 | 2017 | -              | 0 | 0 | Yes | 8786                                      |
| 1095F |       | 2017 | 2017 | -              | 0 | 0 | Yes | 8784                                      |
| 1097F |       | 2017 | 2017 | -              | 0 | 0 | Yes | 8783                                      |
| 1098M |       | 2017 | 2017 | -              | 0 | 0 | Yes | 8781                                      |
| 1105M | 1015M | 2017 | 2020 | Wapiti Lake    | 0 | 0 |     | 9582                                      |
| 1106M | 1015M | 2017 | 2018 | Wapiti Lake    | 0 | 0 | Yes | 9583                                      |
| 1203F | 1015M | 2017 | 0    | Wapiti Lake    | 0 | 0 |     | Newly collected in<br>this study<br>10923 |
| 1201F | 1015M | 2018 | 2020 | Wapiti Lake    | 0 | 0 |     | Newly collected in<br>this study<br>10924 |

861  
862  
863

864 **Supplemental Table S2.** Sample information, meta-data, and descriptive values for each of the 391 Yellowstone  
865 National Park gray wolves in the genetic analysis. Reference to “end event” is either age at death or the last  
866 observation documented for that individual. Time in years to first observed litter; for animals that were translocated  
867 into YNP with offspring or reproduced after leaving YNP will lack an observed time of first litter and likely  
868 considered non-breeding individuals. All ROH estimates have at least 10 SNPs within the 10Kb tract and estimated  
869 from the 24K statistically unlinked set of SNPs. Asterisks indicate wolves with first observed litter dates older than  
870 age at end event that were excluded from the survival model analysis. (Abbreviations:  $F_{ROH}$ , inbreeding coefficient  
871 estimated from runs of homozygosity; HO, observed heterozygosity; ROH, runs of homozygosity; N\_litters, number  
872 of litters identified from the pedigree; propr., proportion; YOB, year of birth; YOD, year of death)

| Field_ID | Breeding status | Age (years) at end event | Time (years) to first [observed] litter | N_litters | HO     | ROH | FROH  | Propr. of Low impact SNPs | Propr. of Moderate impact SNPs | Propr. of High impact SNPs | Propr. of Modifying SNPs |
|----------|-----------------|--------------------------|-----------------------------------------|-----------|--------|-----|-------|---------------------------|--------------------------------|----------------------------|--------------------------|
| 016F     | Breeder         | 5.3                      | 1                                       | 5         | 0.7829 | 712 | 0.393 | 0.0243                    | 0.0097                         | 0.0003                     | 0.9657                   |
| 165M     | Breeder         | 2.5                      | 1                                       | 2         | 0.7985 | 763 | 0.402 | 0.0248                    | 0.0107                         | 0.0005                     | 0.964                    |
| 380F     | Breeder         | 5.4                      | 1                                       | 2         | 0.7898 | 701 | 0.401 | 0.0254                    | 0.0115                         | 0.0004                     | 0.9628                   |
| 870F     | Breeder         | 6.9                      | 1                                       | 2         | 0.7785 | 666 | 0.356 | 0.0253                    | 0.0108                         | 0.0006                     | 0.9633                   |
| 002M     | Breeder         | 8.7                      | 2                                       | 6         | 0.8244 | 658 | 0.311 | 0.0261                    | 0.0117                         | 0.0006                     | 0.9616                   |
| 007F     | Breeder         | 8.1                      | 2                                       | 6         | 0.7764 | 699 | 0.364 | 0.0236                    | 0.0093                         | 0.0006                     | 0.9665                   |
| 008M     | Breeder         | 6.2                      | 2                                       | 6         | 0.792  | 719 | 0.405 | 0.0255                    | 0.0095                         | 0.0007                     | 0.9643                   |
| 014F     | Breeder         | 7.0                      | 2                                       | 4         | 0.7861 | 678 | 0.349 | 0.0254                    | 0.0106                         | 0.0005                     | 0.9635                   |
| 017F     | Breeder         | 2.2                      | 2                                       | 1         | 0.8279 | 475 | 0.21  | 0.0206                    | 0.0069                         | 0.0005                     | 0.972                    |
| 019F     | Breeder         | 2.0                      | 2                                       |           | 0.7906 | 685 | 0.392 | 0.0261                    | 0.0101                         | 0.0005                     | 0.9633                   |
| 021M     | Breeder         | 9.2                      | 2                                       | 11        | 0.8177 | 704 | 0.328 | 0.0278                    | 0.0105                         | 0.0007                     | 0.9611                   |
| 029M     | Breeder         | 3.5                      | 2                                       | 2         | 0.7716 | 680 | 0.351 | 0.0246                    | 0.0108                         | 0.0006                     | 0.964                    |
| 037F     | Breeder         | 2.6                      | 2                                       | 1         | 0.758  | 603 | 0.309 | 0.025                     | 0.0113                         | 0.0009                     | 0.9628                   |



|       |         |      |    |   |        |     |       |        |        |        |        |
|-------|---------|------|----|---|--------|-----|-------|--------|--------|--------|--------|
| 041F  | Breeder | 2.6  | 2  | 2 | 0.7821 | 641 | 0.348 | 0.0254 | 0.0109 | 0.0005 | 0.9633 |
| 042F  | Breeder | 8.8  | 2  | 5 | 0.7763 | 570 | 0.387 | 0.0262 | 0.0113 | 0.0007 | 0.9618 |
| 048F  | Breeder | 9.6  | 2  | 6 | 0.7512 | 593 | 0.3   | 0.0269 | 0.0123 | 0.0008 | 0.96   |
| 078F  | Breeder | 2.6  | 2  |   | 0.7859 | 689 | 0.408 | 0.0235 | 0.01   | 0.0005 | 0.9661 |
| 1091F | Breeder | 2.7  | 2  | 1 | 0.7909 | 659 | 0.403 | 0.0236 | 0.0106 | 0.0006 | 0.9652 |
| 1093F | Breeder | 11.0 | 2  | 1 | 0.777  | 668 | 0.359 | 0.0248 | 0.0099 | 0.0004 | 0.9649 |
| 148F  | Breeder | 2.9  | 2  |   | 0.7863 | 712 | 0.398 | 0.0238 | 0.0106 | 0.0007 | 0.9649 |
| 152F  | Breeder | 7.3  | 2  | 5 | 0.7877 | 703 | 0.402 | 0.025  | 0.0105 | 0.0008 | 0.9638 |
| 155F  | Breeder | 2.9  | 2  |   | 0.8124 | 766 | 0.387 | 0.025  | 0.0107 | 0.0004 | 0.9639 |
| 212F  | Breeder | 2.8  | 2  | 1 | 0.8066 | 554 | 0.459 | 0.0248 | 0.0103 | 0.0009 | 0.964  |
| 220F  | Breeder | 3.3  | 2  | 1 | 0.8041 | 713 | 0.427 | 0.0261 | 0.01   | 0.0005 | 0.9633 |
| 224M  | Breeder | 1.9  | 2* | 1 | 0.7748 | 656 | 0.354 | 0.0248 | 0.012  | 0.0002 | 0.963  |
| 251F  | Breeder | 3.2  | 2  | 2 | 0.7735 | 653 | 0.348 | 0.0265 | 0.0119 | 0.0004 | 0.9612 |
| 255F  | Breeder | 4.6  | 2  | 1 | 0.7809 | 692 | 0.347 | 0.0276 | 0.0108 | 0.0002 | 0.9614 |
| 261M  | Breeder | 3.1  | 2  | 2 | 0.8204 | 791 | 0.471 | 0.0247 | 0.0101 | 0.0005 | 0.9648 |
| 271F  | Breeder | 8.4  | 2  | 2 | 0.8154 | 720 | 0.456 | 0.0243 | 0.01   | 0.0003 | 0.9654 |
| 288F  | Breeder | 4.7  | 2  | 2 | 0.8172 | 616 | 0.29  | 0.0253 | 0.009  | 0.0005 | 0.9651 |
| 295M  | Breeder | 5.2  | 2  | 5 | 0.7774 | 618 | 0.349 | 0.0254 | 0.0116 | 0.0007 | 0.9622 |
| 296M  | Breeder | 2.9  | 2  | 1 | 0.8083 | 771 | 0.407 | 0.0243 | 0.0091 | 0.0003 | 0.9663 |
| 301M  | Breeder | 4.9  | 2  | 1 | 0.8175 | 669 | 0.308 | 0.0263 | 0.0105 | 0.0009 | 0.9624 |
| 353F  | Breeder | 6.9  | 2  | 2 | 0.8054 | 606 | 0.285 | 0.0271 | 0.0085 | 0.0002 | 0.9642 |
| 386F  | Breeder | 3.8  | 2  | 1 | 0.7766 | 701 | 0.349 | 0.0278 | 0.0109 | 0.0002 | 0.961  |
| 469F  | Breeder | 8.9  | 2  | 4 | 0.7919 | 685 | 0.418 | 0.0274 | 0.0097 | 0.0004 | 0.9625 |

|      |         |     |   |   |        |     |       |        |        |        |        |
|------|---------|-----|---|---|--------|-----|-------|--------|--------|--------|--------|
| 470F | Breeder | 6.8 | 2 | 1 | 0.8202 | 709 | 0.355 | 0.0258 | 0.0103 | 0.0005 | 0.9634 |
| 471F | Breeder | 9.0 | 2 | 2 | 0.7801 | 630 | 0.367 | 0.029  | 0.0115 | 0.0003 | 0.9592 |
| 480M | Breeder | 6.9 | 2 | 3 | 0.7895 | 675 | 0.397 | 0.0253 | 0.0099 | 0.0008 | 0.9639 |
| 486F | Breeder | 7.6 | 2 | 6 | 0.7602 | 635 | 0.33  | 0.0244 | 0.011  | 0.0004 | 0.9641 |
| 489M | Breeder | 5.0 | 2 | 1 | 0.8134 | 645 | 0.448 | 0.0238 | 0.0098 | 0.0005 | 0.9659 |
| 490M | Breeder | 5.7 | 2 | 2 | 0.8365 | 773 | 0.43  | 0.0236 | 0.0094 | 0.0003 | 0.9666 |
| 527F | Breeder | 6.5 | 2 | 2 | 0.7851 | 668 | 0.377 | 0.0251 | 0.0103 | 0.0003 | 0.9642 |
| 529F | Breeder | 2.6 | 2 |   | 0.8049 | 696 | 0.437 | 0.0253 | 0.0103 | 0.0006 | 0.9639 |
| 537F | Breeder | 7.4 | 2 | 7 | 0.7529 | 612 | 0.314 | 0.0261 | 0.0101 | 0.0004 | 0.9634 |
| 569F | Breeder | 5.5 | 2 | 4 | 0.8011 | 577 | 0.433 | 0.025  | 0.0115 | 0.0004 | 0.9631 |
| 571F | Breeder | 4.0 | 2 |   | 0.8035 | 730 | 0.365 | 0.024  | 0.0115 | 0.0006 | 0.9639 |
| 590M | Breeder | 2.7 | 2 |   | 0.7731 | 648 | 0.351 | 0.027  | 0.0124 | 0.0005 | 0.9602 |
| 625F | Breeder | 2.9 | 2 |   | 0.8083 | 668 | 0.45  | 0.0245 | 0.0101 | 0.0008 | 0.9646 |
| 639M | Breeder | 2.0 | 2 |   | 0.7859 | 700 | 0.403 | 0.0254 | 0.0109 | 0.0005 | 0.9632 |
| 640F | Breeder | 3.0 | 2 | 1 | 0.7795 | 664 | 0.364 | 0.0219 | 0.0104 | 0.0003 | 0.9674 |
| 642F | Breeder | 4.5 | 2 |   | 0.8326 | 532 | 0.248 | 0.0281 | 0.011  | 0.0003 | 0.9606 |
| 691F | Breeder | 3.8 | 2 |   | 0.791  | 627 | 0.387 | 0.0255 | 0.0104 | 0.0005 | 0.9636 |
| 694F | Breeder | 3.0 | 2 |   | 0.8086 | 729 | 0.393 | 0.0258 | 0.0101 | 0.0006 | 0.9635 |
| 733F | Breeder | 3.5 | 2 |   | 0.7913 | 672 | 0.411 | 0.0254 | 0.0106 | 0.0006 | 0.9634 |
| 752F | Breeder | 3.6 | 2 |   | 0.7903 | 722 | 0.39  | 0.026  | 0.0101 | 0.0008 | 0.9632 |
| 755M | Breeder | 8.9 | 2 | 4 | 0.7659 | 602 | 0.329 | 0.0253 | 0.0111 | 0.0005 | 0.9631 |
| 820F | Breeder | 2.4 | 2 |   | 0.7733 | 600 | 0.348 | 0.0258 | 0.0105 | 0.0005 | 0.9632 |
| 838M | Breeder | 5.1 | 2 | 1 | 0.8137 | 707 | 0.353 | 0.0254 | 0.0094 | 0.0006 | 0.9645 |

|        |         |      |   |   |        |     |       |        |        |        |        |
|--------|---------|------|---|---|--------|-----|-------|--------|--------|--------|--------|
| 889F   | Breeder | 3.6  | 2 |   | 0.7967 | 719 | 0.332 | 0.025  | 0.0103 | 0.0004 | 0.9642 |
| 890M   | Breeder | 6.8  | 2 | 1 | 0.7802 | 708 | 0.408 | 0.0275 | 0.0102 | 0.0005 | 0.9618 |
| 907F   | Breeder | 4.8  | 2 |   | 0.781  | 672 | 0.376 | 0.0222 | 0.012  | 0.0005 | 0.9653 |
| 909F   | Breeder | 8.0  | 2 | 5 | 0.8142 | 681 | 0.324 | 0.0259 | 0.0101 | 0.0004 | 0.9636 |
| 963F   | Breeder | 3.8  | 2 | 1 | 0.7991 | 657 | 0.428 | 0.0248 | 0.0099 | 0.0007 | 0.9647 |
| 966M   | Breeder | 3.5  | 2 |   | 0.803  | 689 | 0.446 | 0.0254 | 0.0111 | 0.0005 | 0.963  |
| 969F   | Breeder | 4.8  | 2 |   | 0.7845 | 622 | 0.367 | 0.025  | 0.0109 | 0.0006 | 0.9635 |
| SW147M | Breeder | 6.5  | 2 | 1 | 0.7982 | 633 | 0.39  | 0.0252 | 0.0106 | 0.0008 | 0.9635 |
| 006M   | Breeder | 4.4  | 3 | 3 | 0.802  | 724 | 0.362 | 0.0259 | 0.0107 | 0.0003 | 0.9631 |
| 033F   | Breeder | 6.3  | 3 | 4 | 0.7583 | 600 | 0.309 | 0.027  | 0.0115 | 0.0005 | 0.961  |
| 034M   | Breeder | 7.6  | 3 | 6 | 0.7668 | 501 | 0.259 | 0.0239 | 0.01   | 0.0006 | 0.9655 |
| 040F   | Breeder | 5.1  | 3 | 2 | 0.7507 | 582 | 0.304 | 0.0252 | 0.0094 | 0.0008 | 0.9647 |
| 070M   | Breeder | 9.1  | 3 |   | 0.8006 | 537 | 0.248 | 0.0271 | 0.0116 | 0.0002 | 0.9611 |
| 072M   | Breeder | 7.5  | 3 | 7 | 0.7796 | 621 | 0.347 | 0.0249 | 0.0108 | 0.0005 | 0.9638 |
| 1015M  | Breeder | 3.8  | 3 | 3 | 0.7749 | 635 | 0.354 | 0.026  | 0.0097 | 0.0004 | 0.9639 |
| 105F   | Breeder | 6.1  | 3 | 1 | 0.7553 | 593 | 0.313 | 0.024  | 0.0101 | 0.0003 | 0.9655 |
| 106F   | Breeder | 8.0  | 3 | 4 | 0.747  | 567 | 0.297 | 0.0258 | 0.0102 | 0.0006 | 0.9634 |
| 120M   | Breeder | 3.2  | 3 | 1 | 0.8174 | 618 | 0.472 | 0.0251 | 0.0105 | 0.0006 | 0.9639 |
| 126F   | Breeder | 11.9 | 3 | 7 | 0.7793 | 645 | 0.35  | 0.026  | 0.0105 | 0.0006 | 0.9629 |
| 206M   | Breeder | 6.9  | 3 | 4 | 0.7783 | 665 | 0.354 | 0.025  | 0.0095 | 0.0006 | 0.9649 |
| 209F   | Breeder | 8.4  | 3 | 3 | 0.8252 | 558 | 0.262 | 0.0243 | 0.011  | 0.0006 | 0.9641 |
| 217F   | Breeder | 3.7  | 3 | 1 | 0.7891 | 685 | 0.335 | 0.0268 | 0.0114 | 0.0004 | 0.9613 |
| 243M   | Breeder | 4.6  | 3 | 1 | 0.8321 | 694 | 0.333 | 0.0262 | 0.0094 | 0.0005 | 0.9639 |

|      |         |      |   |   |        |     |       |        |        |        |        |
|------|---------|------|---|---|--------|-----|-------|--------|--------|--------|--------|
| 259F | Breeder | 3.0  | 3 | 1 | 0.7991 | 684 | 0.412 | 0.0258 | 0.0097 | 0.0006 | 0.9639 |
| 287M | Breeder | 4.8  | 3 | 1 | 0.7936 | 736 | 0.373 | 0.0251 | 0.0101 | 0.0004 | 0.9643 |
| 294M | Breeder | 4.0  | 3 | 3 | 0.8057 | 732 | 0.461 | 0.0247 | 0.0104 | 0.0007 | 0.9641 |
| 302M | Breeder | 9.5  | 3 | 4 | 0.7939 | 710 | 0.422 | 0.0231 | 0.0104 | 0.0005 | 0.966  |
| 377M | Breeder | 5.0  | 3 | 2 | 0.8176 | 667 | 0.486 | 0.0248 | 0.0103 | 0.0003 | 0.9646 |
| 381M | Breeder | 3.3  | 3 | 1 | 0.776  | 718 | 0.362 | 0.0254 | 0.0105 | 0.0007 | 0.9634 |
| 472F | Breeder | 10.6 | 3 | 7 | 0.7612 | 630 | 0.323 | 0.0274 | 0.01   | 0.0007 | 0.9619 |
| 482M | Breeder | 8.9  | 3 | 5 | 0.7943 | 705 | 0.415 | 0.025  | 0.0099 | 0.0005 | 0.9647 |
| 534M | Breeder | 8.4  | 3 | 7 | 0.7635 | 682 | 0.349 | 0.027  | 0.0111 | 0.0005 | 0.9615 |
| 536F | Breeder | 6.6  | 3 | 3 | 0.7817 | 641 | 0.37  | 0.0248 | 0.0091 | 0.0008 | 0.9652 |
| 588F | Breeder | 3.6  | 3 | 1 | 0.8068 | 709 | 0.426 | 0.0255 | 0.0101 | 0.0006 | 0.9638 |
| 627M | Breeder | 5.4  | 3 | 4 | 0.7958 | 714 | 0.338 | 0.0263 | 0.0097 | 0.0006 | 0.9634 |
| 636M | Breeder | 4.6  | 3 | 2 | 0.8246 | 715 | 0.488 | 0.0269 | 0.0104 | 0.0003 | 0.9623 |
| 641M | Breeder | 4.7  | 3 | 1 | 0.7891 | 720 | 0.372 | 0.0256 | 0.0104 | 0.0004 | 0.9636 |
| 689M | Breeder | 8.6  | 3 | 4 | 0.7698 | 665 | 0.343 | 0.0252 | 0.0114 | 0.0006 | 0.9627 |
| 692F | Breeder | 5.6  | 3 | 2 | 0.7746 | 605 | 0.353 | 0.0306 | 0.0112 | 0.0007 | 0.9575 |
| 693F | Breeder | 7.5  | 3 | 2 | 0.7677 | 631 | 0.327 | 0.0272 | 0.0109 | 0.0004 | 0.9614 |
| 696F | Breeder | 4.8  | 3 | 1 | 0.8279 | 764 | 0.437 | 0.0255 | 0.0092 | 0.0003 | 0.965  |
| 712M | Breeder | 10.8 | 3 | 2 | 0.789  | 727 | 0.362 | 0.0253 | 0.0105 | 0.0003 | 0.9639 |
| 715F | Breeder | 4.6  | 3 |   | 0.8163 | 729 | 0.419 | 0.0254 | 0.0112 | 0.0005 | 0.9629 |
| 757F | Breeder | 4.2  | 3 |   | 0.8274 | 793 | 0.41  | 0.0249 | 0.0106 | 0.0005 | 0.964  |
| 760M | Breeder | 6.9  | 3 | 2 | 0.7822 | 640 | 0.363 | 0.0251 | 0.0117 | 0.0006 | 0.9627 |
| 778M | Breeder | 8.7  | 3 | 1 | 0.7929 | 752 | 0.404 | 0.0254 | 0.0096 | 0.0006 | 0.9644 |

|        |         |      |    |   |        |     |       |        |        |        |        |
|--------|---------|------|----|---|--------|-----|-------|--------|--------|--------|--------|
| 779F   | Breeder | 7.8  | 3  | 3 | 0.7774 | 686 | 0.368 | 0.0254 | 0.0101 | 0.0004 | 0.964  |
| 911M   | Breeder | 6.4  | 3  | 3 | 0.7869 | 703 | 0.382 | 0.0258 | 0.0105 | 0.0002 | 0.9635 |
| 926F   | Breeder | 6.8  | 3  | 2 | 0.7742 | 580 | 0.343 | 0.0254 | 0.0097 | 0.0005 | 0.9644 |
| 953F   | Breeder | 4.8  | 3  | 1 | 0.8185 | 619 | 0.461 | 0.0252 | 0.0108 | 0.0006 | 0.9635 |
| 1118F  | Breeder | 3.8  | 4* |   | 0.7812 | 691 | 0.381 | 0.0248 | 0.0099 | 0.0006 | 0.9647 |
| 103F   | Breeder | 7.0  | 4  | 1 | 0.7469 | 586 | 0.294 | 0.0225 | 0.0116 | 0.0004 | 0.9655 |
| 151F   | Breeder | 11.5 | 4  | 6 | 0.8027 | 693 | 0.428 | 0.026  | 0.01   | 0.0004 | 0.9636 |
| 190F   | Breeder | 5.5  | 4  |   | 0.7942 | 675 | 0.407 | 0.0239 | 0.0102 | 0.0002 | 0.9656 |
| 205M   | Breeder | 4.5  | 4  | 1 | 0.7631 | 606 | 0.317 | 0.0271 | 0.0119 | 0.0007 | 0.9603 |
| 227M   | Breeder | 4.9  | 4  | 1 | 0.8078 | 737 | 0.392 | 0.0253 | 0.0112 | 0.0005 | 0.963  |
| 303M   | Breeder | 10.9 | 4  | 7 | 0.8201 | 793 | 0.432 | 0.0247 | 0.01   | 0.0005 | 0.9647 |
| 383M   | Breeder | 6.9  | 4  | 2 | 0.7734 | 572 | 0.326 | 0.0257 | 0.0112 | 0.0005 | 0.9626 |
| 540F   | Breeder | 7.5  | 4  | 2 | 0.7537 | 590 | 0.297 | 0.0269 | 0.0119 | 0.0003 | 0.9609 |
| 541M   | Breeder | 7.5  | 4  | 2 | 0.7787 | 663 | 0.369 | 0.0232 | 0.0111 | 0.0002 | 0.9654 |
| 685M   | Breeder | 6.9  | 4  | 1 | 0.8246 | 764 | 0.457 | 0.0259 | 0.0104 | 0.0003 | 0.9634 |
| 759F   | Breeder | 3.9  | 4* |   | 0.812  | 583 | 0.454 | 0.0257 | 0.0097 | 0.0005 | 0.9641 |
| 871M   | Breeder | 4.5  | 4  | 1 | 0.8012 | 724 | 0.389 | 0.0259 | 0.0118 | 0.0006 | 0.9617 |
| 978F   | Breeder | 4.8  | 4  |   | 0.7763 | 644 | 0.357 | 0.0277 | 0.0101 | 0.0007 | 0.9615 |
| SW763M | Breeder | 9.9  | 4  | 3 | 0.7887 | 619 | 0.393 | 0.0242 | 0.0122 | 0.0006 | 0.963  |
| 192M   | Breeder | 12.1 | 5  | 1 | 0.8225 | 799 | 0.412 | 0.0247 | 0.01   | 0.0004 | 0.9649 |
| 207M   | Breeder | 7.4  | 5  | 1 | 0.7981 | 706 | 0.42  | 0.024  | 0.0098 | 0.0005 | 0.9657 |
| 344F   | Breeder | 5.3  | 5  | 1 | 0.8117 | 696 | 0.453 | 0.0255 | 0.0099 | 0.0004 | 0.9641 |
| 545F   | Breeder | 5.3  | 5  | 1 | 0.7995 | 745 | 0.412 | 0.0258 | 0.0107 | 0.0003 | 0.9631 |

|      |         |      |   |   |        |     |       |        |        |        |        |
|------|---------|------|---|---|--------|-----|-------|--------|--------|--------|--------|
| 586M | Breeder | 9.5  | 5 | 1 | 0.8192 | 651 | 0.467 | 0.0246 | 0.0106 | 0.0003 | 0.9645 |
| 695M | Breeder | 7.6  | 5 | 1 | 0.7949 | 674 | 0.409 | 0.0254 | 0.0103 | 0.0002 | 0.9641 |
| 794F | Breeder | 7.1  | 5 | 2 | 0.7815 | 687 | 0.333 | 0.0255 | 0.0106 | 0.0005 | 0.9634 |
| 925M | Breeder | 5.9  | 5 | 2 | 0.7749 | 564 | 0.363 | 0.0228 | 0.0111 | 0.0007 | 0.9653 |
| 970F | Breeder | 6.0  | 5 | 2 | 0.7713 | 651 | 0.349 | 0.0252 | 0.0104 | 0.0005 | 0.9639 |
| 976F | Breeder | 7.8  | 5 | 1 | 0.8082 | 716 | 0.417 | 0.0281 | 0.0103 | 0.0005 | 0.9611 |
| 992M | Breeder | 5.0  | 5 |   | 0.7998 | 706 | 0.438 | 0.0251 | 0.0106 | 0.0005 | 0.9638 |
| 478F | Breeder | 12.6 | 6 | 4 | 0.827  | 788 | 0.483 | 0.0258 | 0.0099 | 0.0005 | 0.9638 |
| 495M | Breeder | 8.4  | 6 | 6 | 0.813  | 677 | 0.461 | 0.0252 | 0.0109 | 0.0005 | 0.9634 |
| 587M | Breeder | 9.1  | 6 | 1 | 0.8304 | 720 | 0.503 | 0.0254 | 0.0112 | 0.0004 | 0.963  |
| 633F | Breeder | 7.4  | 6 | 1 | 0.7971 | 676 | 0.395 | 0.0257 | 0.0105 | 0.0005 | 0.9634 |
| 686F | Breeder | 6.4  | 6 |   | 0.7854 | 713 | 0.371 | 0.0256 | 0.0108 | 0.0003 | 0.9633 |
| 949M | Breeder | 6.4  | 6 |   | 0.7792 | 670 | 0.381 | 0.0243 | 0.0103 | 0.0005 | 0.9649 |
| 910M | Breeder | 8.8  | 8 |   | 0.837  | 596 | 0.531 | 0.025  | 0.0102 | 0.0004 | 0.9644 |
| 005F | Breeder | 10.6 |   | 4 | 0.7975 | 765 | 0.418 | 0.0255 | 0.0108 | 0.0005 | 0.9633 |
| 009F | Breeder | 9.6  |   | 3 | 0.8006 | 732 | 0.415 | 0.0258 | 0.0097 | 0.0006 | 0.9639 |
| 013M | Breeder | 11.9 |   | 3 | 0.7674 | 593 | 0.298 | 0.0234 | 0.0095 | 0.0003 | 0.9667 |
| 027F | Breeder | 8.5  |   | 2 | 0.7466 | 578 | 0.3   | 0.0253 | 0.0106 | 0.0007 | 0.9634 |
| 035M | Breeder | 5.8  |   | 2 | 0.769  | 632 | 0.305 | 0.0268 | 0.0105 | 0.0006 | 0.9621 |
| 036F | Breeder | 3.0  |   | 1 | 0.7595 | 611 | 0.312 | 0.0242 | 0.0101 | 0.0011 | 0.9646 |
| 038M | Breeder | 8.7  |   | 2 | 0.7669 | 529 | 0.288 | 0.0219 | 0.0101 | 0.0008 | 0.9672 |
| 104M | Breeder | 3.6  |   |   | 0.7483 | 574 | 0.29  | 0.025  | 0.0115 | 0.0003 | 0.9632 |
| 614M | Breeder |      |   | 1 | 0.8043 | 674 | 0.436 | 0.0257 | 0.0101 | 0.0006 | 0.9637 |

|       |             |     |   |        |     |       |        |        |        |        |
|-------|-------------|-----|---|--------|-----|-------|--------|--------|--------|--------|
| 821F  | Breeder     | 8.0 | 1 | 0.7924 | 677 | 0.422 | 0.0242 | 0.011  | 0.0002 | 0.9645 |
| 1005F | Non-breeder | 2.8 |   | 0.7905 | 675 | 0.391 | 0.0272 | 0.0097 | 0.0003 | 0.9628 |
| 1014M | Non-breeder | 4.8 |   | 0.7793 | 684 | 0.386 | 0.0279 | 0.0105 | 0.0008 | 0.9609 |
| 1048M | Non-breeder | 2.8 |   | 0.8006 | 725 | 0.434 | 0.0269 | 0.0111 | 0.0006 | 0.9615 |
| 1049F | Non-breeder | 1.8 |   | 0.8007 | 662 | 0.396 | 0.027  | 0.0105 | 0.0004 | 0.9622 |
| 1090F | Non-breeder | 3.8 |   | 0.7781 | 653 | 0.366 | 0.0244 | 0.0106 | 0.0008 | 0.9642 |
| 1104F | Non-breeder | 0.8 |   | 0.8036 | 728 | 0.389 | 0.0281 | 0.011  | 0.0009 | 0.96   |
| 1106M | Non-breeder | 0.8 |   | 0.7898 | 688 | 0.406 | 0.0259 | 0.0116 | 0.0003 | 0.9622 |
| 1119F | Non-breeder | 1.8 |   | 0.7794 | 651 | 0.381 | 0.025  | 0.0107 | 0.0005 | 0.9638 |
| 118M  | Non-breeder | 2.0 |   | 0.8048 | 655 | 0.447 | 0.0271 | 0.0106 | 0.0004 | 0.9618 |
| 147M  | Non-breeder | 3.2 |   | 0.7666 | 603 | 0.323 | 0.025  | 0.0107 | 0.0007 | 0.9636 |
| 241M  | Non-breeder | 1.0 |   | 0.8142 | 748 | 0.456 | 0.0244 | 0.01   | 0.0002 | 0.9654 |
| 253M  | Non-breeder | 4.8 |   | 0.7847 | 704 | 0.369 | 0.0265 | 0.0087 | 0.0003 | 0.9645 |
| 289M  | Non-breeder | 1.7 |   | 0.7919 | 717 | 0.389 | 0.0273 | 0.0117 | 0.0004 | 0.9605 |
| 292M  | Non-breeder | 2.9 |   | 0.7846 | 650 | 0.373 | 0.0252 | 0.0113 | 0.0004 | 0.9632 |
| 350M  | Non-breeder | 1.4 |   | 0.7798 | 722 | 0.376 | 0.0281 | 0.0122 | 0.0005 | 0.9592 |
| 389M  | Non-breeder | 2.1 |   | 0.8258 | 701 | 0.506 | 0.0245 | 0.0104 | 0.0005 | 0.9646 |
| 485F  | Non-breeder | 1.9 |   | 0.7886 | 606 | 0.28  | 0.0227 | 0.01   | 0.0006 | 0.9668 |
| 525F  | Non-breeder | 3.7 |   | 0.7856 | 581 | 0.388 | 0.0257 | 0.0105 | 0.0005 | 0.9633 |
| 698M  | Non-breeder | 4.1 |   | 0.764  | 637 | 0.328 | 0.026  | 0.0104 | 0.0007 | 0.9628 |
| 015M  | Non-breeder | 2.1 |   | 0.8052 | 428 | 0.174 | 0.0251 | 0.0105 | 0.0005 | 0.964  |
| 020M  | Non-breeder | 1.2 |   | 0.7932 | 740 | 0.393 | 0.0275 | 0.0102 | 0.0007 | 0.9616 |
| 022M  | Non-breeder | 0.7 |   | 0.8016 | 758 | 0.392 | 0.0254 | 0.011  | 0.0006 | 0.963  |

|       |             |     |        |     |       |        |        |        |        |
|-------|-------------|-----|--------|-----|-------|--------|--------|--------|--------|
| 024F  | Non-breeder | 3.5 | 0.7801 | 613 | 0.371 | 0.0258 | 0.0112 | 0.0005 | 0.9625 |
| 026F  | Non-breeder | 1.4 | 0.7753 | 514 | 0.274 | 0.0201 | 0.0099 | 0.0005 | 0.9694 |
| 031M  | Non-breeder | 2.6 | 0.7856 | 525 | 0.274 | 0.0197 | 0.01   | 0.0003 | 0.97   |
| 043M  | Non-breeder | 2.9 | 0.7819 | 685 | 0.362 | 0.024  | 0.0111 | 0.0004 | 0.9645 |
| 044F  | Non-breeder | 9.0 | 0.8019 | 648 | 0.318 | 0.0277 | 0.0116 | 0.0005 | 0.9602 |
| 045F  | Non-breeder | 0.4 | 0.7942 | 676 | 0.381 | 0.0255 | 0.0118 | 0.0007 | 0.962  |
| 055M  | Non-breeder | 3.9 | 0.7909 | 715 | 0.413 | 0.0242 | 0.01   | 0.0006 | 0.9652 |
| 058F  | Non-breeder | 0.0 | 0.8299 | 511 | 0.514 | 0.0249 | 0.0108 | 0.0003 | 0.964  |
| 063F  | Non-breeder | 1.5 | 0.7777 | 648 | 0.333 | 0.0238 | 0.0107 | 0.0004 | 0.9651 |
| 064F  | Non-breeder | 1.1 | 0.7754 | 609 | 0.345 | 0.0246 | 0.0109 | 0.0004 | 0.964  |
| 065F  | Non-breeder | 1.1 | 0.7765 | 629 | 0.354 | 0.0244 | 0.0107 | 0.0002 | 0.9647 |
| 068F  | Non-breeder | 1.4 | 0.7854 | 568 | 0.314 | 0.0212 | 0.0106 | 0.0001 | 0.968  |
| 069M  | Non-breeder | 1.2 | 0.7738 | 636 | 0.345 | 0.027  | 0.0103 | 0.0007 | 0.9619 |
| 071F  | Non-breeder | 1.1 | 0.7753 | 609 | 0.341 | 0.0261 | 0.0106 | 0.0002 | 0.9631 |
| 077F  | Non-breeder | 3.7 | 0.8109 | 678 | 0.347 | 0.0244 | 0.0105 | 0.0004 | 0.9647 |
| 082M  | Non-breeder | 2.1 | 0.804  | 781 | 0.417 | 0.0257 | 0.0099 | 0.0004 | 0.964  |
| 083M  | Non-breeder | 1.5 | 0.7931 | 696 | 0.406 | 0.0257 | 0.0102 | 0.0006 | 0.9635 |
| 085F  | Non-breeder | 1.6 | 0.8188 | 683 | 0.337 | 0.0264 | 0.0096 | 0.0003 | 0.9636 |
| 095F  | Non-breeder | 1.1 | 0.8311 | 537 | 0.24  | 0.0265 | 0.0092 | 0.0003 | 0.964  |
| 1012M | Non-breeder | 0.9 | 0.7914 | 651 | 0.418 | 0.0251 | 0.0112 | 0.0006 | 0.9631 |
| 1013M | Non-breeder | 2.7 | 0.7771 | 670 | 0.361 | 0.0256 | 0.0106 | 0.0006 | 0.9633 |
| 1016F | Non-breeder | 0.8 | 0.7749 | 682 | 0.355 | 0.0259 | 0.0104 | 0.0008 | 0.963  |
| 1047M | Non-breeder | 3.8 | 0.806  | 666 | 0.442 | 0.0268 | 0.0114 | 0.0006 | 0.9612 |



|       |             |     |        |     |       |        |        |        |        |
|-------|-------------|-----|--------|-----|-------|--------|--------|--------|--------|
| 1050F | Non-breeder | 1.0 | 0.8006 | 675 | 0.423 | 0.0267 | 0.0096 | 0.0005 | 0.9632 |
| 1051M | Non-breeder | 0.8 | 0.8041 | 707 | 0.445 | 0.0247 | 0.0104 | 0.0006 | 0.9643 |
| 1094M | Non-breeder | 0.0 | 0.8163 | 663 | 0.307 | 0.0258 | 0.0105 | 0.0005 | 0.9632 |
| 1095F | Non-breeder | 0.0 | 0.8022 | 703 | 0.442 | 0.0268 | 0.0095 | 0.0004 | 0.9633 |
| 1096M | Non-breeder | 0.0 | 0.792  | 685 | 0.404 | 0.0277 | 0.0098 | 0.0005 | 0.962  |
| 1097F | Non-breeder | 0.0 | 0.7997 | 723 | 0.431 | 0.0276 | 0.0096 | 0.0005 | 0.9622 |
| 1098M | Non-breeder | 0.0 | 0.8039 | 751 | 0.43  | 0.027  | 0.0098 | 0.0003 | 0.9629 |
| 1108M | Non-breeder | 1.8 | 0.7964 | 704 | 0.411 | 0.0261 | 0.0105 | 0.0006 | 0.9627 |
| 111F  | Non-breeder | 1.2 | 0.768  | 614 | 0.309 | 0.0277 | 0.011  | 0.0006 | 0.9608 |
| 115F  | Non-breeder | 1.3 | 0.7818 | 632 | 0.309 | 0.0252 | 0.0114 | 0.0009 | 0.9625 |
| 122M  | Non-breeder | 2.3 | 0.8147 | 627 | 0.475 | 0.026  | 0.0105 | 0.0006 | 0.9629 |
| 123M  | Non-breeder | 2.6 | 0.7836 | 698 | 0.369 | 0.0254 | 0.0102 | 0.0006 | 0.9638 |
| 124M  | Non-breeder | 2.7 | 0.7722 | 599 | 0.356 | 0.0248 | 0.0121 | 0.0006 | 0.9624 |
| 128M  | Non-breeder | 1.1 | 0.7649 | 628 | 0.342 | 0.0255 | 0.0107 | 0.0005 | 0.9633 |
| 136F  | Non-breeder | 2.9 | 0.8176 | 673 | 0.461 | 0.027  | 0.0102 | 0.0005 | 0.9623 |
| 150M  | Non-breeder | 6.5 | 0.7871 | 673 | 0.399 | 0.0256 | 0.0099 | 0.0004 | 0.9641 |
| 153F  | Non-breeder | 1.6 | 0.7911 | 711 | 0.424 | 0.0273 | 0.0105 | 0.0003 | 0.9619 |
| 154F  | Non-breeder | 2.6 | 0.7887 | 707 | 0.413 | 0.0246 | 0.0096 | 0.0005 | 0.9653 |
| 156F  | Non-breeder | 2.3 | 0.7928 | 710 | 0.42  | 0.026  | 0.0102 | 0.0004 | 0.9634 |
| 160F  | Non-breeder | 0.8 | 0.8039 | 721 | 0.445 | 0.0257 | 0.0096 | 0.0005 | 0.9642 |
| 161M  | Non-breeder | 2.9 | 0.796  | 702 | 0.425 | 0.0252 | 0.01   | 0.0005 | 0.9643 |
| 162M  | Non-breeder | 4.0 | 0.8075 | 763 | 0.399 | 0.0251 | 0.0105 | 0.0001 | 0.9643 |
| 168F  | Non-breeder | 1.6 | 0.8204 | 780 | 0.412 | 0.0264 | 0.0107 | 0.0003 | 0.9627 |

|      |             |     |        |     |       |        |        |        |        |
|------|-------------|-----|--------|-----|-------|--------|--------|--------|--------|
| 182M | Non-breeder | 0.5 | 0.7958 | 699 | 0.416 | 0.0254 | 0.0107 | 0.0004 | 0.9635 |
| 183F | Non-breeder | 0.5 | 0.819  | 708 | 0.454 | 0.0256 | 0.0108 | 0.0006 | 0.963  |
| 184F | Non-breeder | 0.5 | 0.8138 | 696 | 0.449 | 0.0265 | 0.011  | 0.0007 | 0.9618 |
| 185M | Non-breeder | 0.6 | 0.7826 | 689 | 0.338 | 0.0249 | 0.0105 | 0.0004 | 0.9642 |
| 186M | Non-breeder | 0.6 | 0.7632 | 609 | 0.33  | 0.025  | 0.0106 | 0.0007 | 0.9638 |
| 187F | Non-breeder | 0.8 | 0.7899 | 602 | 0.277 | 0.0239 | 0.0123 | 0.0005 | 0.9634 |
| 188F | Non-breeder | 2.2 | 0.7995 | 643 | 0.439 | 0.0253 | 0.0102 | 0.0006 | 0.964  |
| 189M | Non-breeder | 1.9 | 0.8125 | 609 | 0.443 | 0.0261 | 0.0114 | 0.0003 | 0.9622 |
| 191M | Non-breeder | 1.9 | 0.7716 | 658 | 0.325 | 0.0266 | 0.0108 | 0.0006 | 0.9621 |
| 196M | Non-breeder | 3.3 | 0.8083 | 781 | 0.44  | 0.0256 | 0.0115 | 0.0002 | 0.9627 |
| 197F | Non-breeder | 1.1 | 0.8348 | 618 | 0.279 | 0.0284 | 0.0094 | 0.0003 | 0.9619 |
| 199M | Non-breeder | 1.1 | 0.7722 | 667 | 0.35  | 0.0277 | 0.0105 | 0.0002 | 0.9616 |
| 201F | Non-breeder | 2.5 | 0.7574 | 619 | 0.321 | 0.0265 | 0.0109 | 0.0007 | 0.962  |
| 203M | Non-breeder | 1.4 | 0.7584 | 619 | 0.306 | 0.0264 | 0.011  | 0.0005 | 0.962  |
| 210M | Non-breeder | 3.0 | 0.8141 | 628 | 0.479 | 0.0253 | 0.0101 | 0.0006 | 0.964  |
| 211M | Non-breeder | 2.8 | 0.8277 | 594 | 0.288 | 0.0235 | 0.009  | 0.0004 | 0.967  |
| 215M | Non-breeder | 2.3 | 0.7769 | 669 | 0.325 | 0.0235 | 0.0109 | 0.0007 | 0.965  |
| 216F | Non-breeder | 1.8 | 0.7862 | 682 | 0.324 | 0.0264 | 0.0117 | 0.0003 | 0.9616 |
| 218F | Non-breeder | 2.3 | 0.7918 | 666 | 0.315 | 0.0258 | 0.0103 | 0.0004 | 0.9635 |
| 221M | Non-breeder | 1.9 | 0.7656 | 640 | 0.325 | 0.024  | 0.0103 | 0.0002 | 0.9656 |
| 222M | Non-breeder | 1.2 | 0.7613 | 626 | 0.342 | 0.0271 | 0.0108 | 0.0002 | 0.9619 |
| 225M | Non-breeder | 0.9 | 0.7937 | 635 | 0.408 | 0.0263 | 0.0102 | 0.0005 | 0.963  |
| 226M | Non-breeder | 0.8 | 0.788  | 684 | 0.391 | 0.0247 | 0.0105 | 0.0004 | 0.9645 |

|      |             |     |        |     |       |        |        |        |        |
|------|-------------|-----|--------|-----|-------|--------|--------|--------|--------|
| 229M | Non-breeder | 2.2 | 0.8027 | 708 | 0.398 | 0.0262 | 0.0108 | 0.0005 | 0.9625 |
| 245M | Non-breeder | 0.7 | 0.7889 | 617 | 0.394 | 0.0247 | 0.0106 | 0.0005 | 0.9642 |
| 246M | Non-breeder | 0.7 | 0.7931 | 591 | 0.389 | 0.0275 | 0.0111 | 0.0004 | 0.9609 |
| 247M | Non-breeder | 0.7 | 0.7925 | 643 | 0.404 | 0.0265 | 0.0106 | 0.0005 | 0.9624 |
| 248M | Non-breeder | 1.3 | 0.7547 | 588 | 0.304 | 0.0256 | 0.0105 | 0.0005 | 0.9634 |
| 249M | Non-breeder | 2.7 | 0.7648 | 593 | 0.32  | 0.0262 | 0.0119 | 0.0003 | 0.9616 |
| 252M | Non-breeder | 2.1 | 0.7764 | 660 | 0.313 | 0.0265 | 0.0118 | 0.0003 | 0.9614 |
| 254M | Non-breeder | 2.3 | 0.7723 | 720 | 0.353 | 0.0267 | 0.0101 | 0.0006 | 0.9626 |
| 257M | Non-breeder | 4.5 | 0.8046 | 660 | 0.444 | 0.0259 | 0.0089 | 0.0006 | 0.9645 |
| 260F | Non-breeder | 2.3 | 0.7906 | 657 | 0.404 | 0.0244 | 0.0097 | 0.0004 | 0.9655 |
| 291M | Non-breeder | 2.3 | 0.8173 | 812 | 0.444 | 0.0257 | 0.0096 | 0.0004 | 0.9643 |
| 293F | Non-breeder | 2.1 | 0.8181 | 707 | 0.427 | 0.0234 | 0.0102 | 0.0008 | 0.9656 |
| 300M | Non-breeder | 4.5 | 0.8024 | 751 | 0.423 | 0.0253 | 0.0095 | 0.0005 | 0.9646 |
| 305M | Non-breeder | 3.0 | 0.7556 | 613 | 0.315 | 0.0231 | 0.0104 | 0.0008 | 0.9657 |
| 307M | Non-breeder | 2.8 | 0.7961 | 683 | 0.406 | 0.0267 | 0.0103 | 0.0006 | 0.9625 |
| 308F | Non-breeder | 0.8 | 0.8021 | 696 | 0.421 | 0.0242 | 0.0105 | 0.0007 | 0.9646 |
| 309F | Non-breeder | 2.8 | 0.7671 | 659 | 0.337 | 0.0258 | 0.0109 | 0.0006 | 0.9627 |
| 341F | Non-breeder | 5.8 | 0.8084 | 583 | 0.263 | 0.0267 | 0.0124 | 0.0001 | 0.9608 |
| 343M | Non-breeder | 1.7 | 0.8333 | 801 | 0.459 | 0.0257 | 0.0104 | 0.0006 | 0.9633 |
| 347M | Non-breeder | 1.6 | 0.8053 | 593 | 0.427 | 0.0246 | 0.0116 | 0.0005 | 0.9634 |
| 348M | Non-breeder | 1.7 | 0.7902 | 728 | 0.411 | 0.0259 | 0.0099 | 0.0007 | 0.9635 |
| 349M | Non-breeder | 1.8 | 0.7956 | 733 | 0.422 | 0.0262 | 0.011  | 0.0002 | 0.9626 |
| 352M | Non-breeder | 1.7 | 0.7967 | 648 | 0.436 | 0.0269 | 0.01   | 0.0006 | 0.9625 |

|      |             |     |        |     |       |        |        |        |        |
|------|-------------|-----|--------|-----|-------|--------|--------|--------|--------|
| 355F | Non-breeder | 3.3 | 0.7942 | 659 | 0.419 | 0.0241 | 0.0104 | 0.0005 | 0.965  |
| 356M | Non-breeder | 2.7 | 0.8168 | 751 | 0.441 | 0.0246 | 0.0107 | 0.0006 | 0.9641 |
| 361M | Non-breeder | 0.7 | 0.8112 | 734 | 0.383 | 0.0257 | 0.0114 | 0.0008 | 0.9621 |
| 375F | Non-breeder | 1.8 | 0.7912 | 700 | 0.406 | 0.0263 | 0.0103 | 0.0006 | 0.9628 |
| 379M | Non-breeder | 4.6 | 0.8222 | 811 | 0.428 | 0.026  | 0.0116 | 0.0002 | 0.9622 |
| 382F | Non-breeder | 1.2 | 0.7903 | 657 | 0.39  | 0.027  | 0.0097 | 0.0005 | 0.9629 |
| 388F | Non-breeder | 3.3 | 0.8136 | 746 | 0.468 | 0.0253 | 0.0105 | 0.0006 | 0.9636 |
| 391F | Non-breeder | 3.1 | 0.7631 | 642 | 0.342 | 0.0249 | 0.0108 | 0.0006 | 0.9637 |
| 392M | Non-breeder | 2.6 | 0.7553 | 620 | 0.3   | 0.026  | 0.0102 | 0.0002 | 0.9636 |
| 451F | Non-breeder | 0.4 | 0.7847 | 704 | 0.36  | 0.0242 | 0.0106 | 0.0004 | 0.9648 |
| 453M | Non-breeder | 2.2 | 0.7842 | 657 | 0.402 | 0.0257 | 0.011  | 0.0006 | 0.9626 |
| 466U | Non-breeder | 0.7 | 0.7878 | 703 | 0.344 | 0.0242 | 0.0112 | 0.0003 | 0.9642 |
| 467M | Non-breeder | 1.6 | 0.7625 | 615 | 0.319 | 0.0231 | 0.0107 | 0.0004 | 0.9658 |
| 468M | Non-breeder | 3.9 | 0.8037 | 741 | 0.405 | 0.0227 | 0.0101 | 0.0008 | 0.9664 |
| 473M | Non-breeder | 1.0 | 0.8131 | 659 | 0.316 | 0.0259 | 0.01   | 0.0009 | 0.9632 |
| 474M | Non-breeder | 1.2 | 0.7916 | 625 | 0.296 | 0.0251 | 0.0112 | 0.0002 | 0.9634 |
| 475F | Non-breeder | 0.8 | 0.7748 | 647 | 0.344 | 0.0232 | 0.0109 | 0.0003 | 0.9656 |
| 477M | Non-breeder | 2.5 | 0.8186 | 736 | 0.48  | 0.0256 | 0.0098 | 0.0004 | 0.9642 |
| 479M | Non-breeder | 3.4 | 0.8104 | 679 | 0.455 | 0.0274 | 0.0101 | 0.0005 | 0.962  |
| 481M | Non-breeder | 1.9 | 0.768  | 649 | 0.354 | 0.0243 | 0.0105 | 0.0006 | 0.9646 |
| 483F | Non-breeder | 2.2 | 0.7608 | 660 | 0.337 | 0.0245 | 0.0101 | 0.0007 | 0.9648 |
| 484M | Non-breeder | 1.3 | 0.7671 | 610 | 0.313 | 0.0277 | 0.0113 | 0.0009 | 0.9601 |
| 488M | Non-breeder | 1.3 | 0.7736 | 665 | 0.349 | 0.0244 | 0.012  | 0.0003 | 0.9633 |

|      |             |     |        |     |       |        |        |        |        |
|------|-------------|-----|--------|-----|-------|--------|--------|--------|--------|
| 491M | Non-breeder | 1.8 | 0.8272 | 721 | 0.492 | 0.0252 | 0.0103 | 0.0006 | 0.964  |
| 493M | Non-breeder | 0.8 | 0.7927 | 649 | 0.398 | 0.0262 | 0.0104 | 0.0004 | 0.963  |
| 496F | Non-breeder | 1.1 | 0.8077 | 654 | 0.445 | 0.0269 | 0.0106 | 0.0007 | 0.9618 |
| 497M | Non-breeder | 3.1 | 0.818  | 643 | 0.484 | 0.0254 | 0.0103 | 0.0003 | 0.964  |
| 498F | Non-breeder | 0.9 | 0.7785 | 654 | 0.317 | 0.0263 | 0.0106 | 0.0003 | 0.9628 |
| 523F | Non-breeder | 3.0 | 0.796  | 576 | 0.406 | 0.0249 | 0.0097 | 0.0007 | 0.9646 |
| 524F | Non-breeder | 2.2 | 0.7813 | 666 | 0.363 | 0.0273 | 0.011  | 0.0006 | 0.9611 |
| 528M | Non-breeder | 2.8 | 0.7814 | 668 | 0.378 | 0.0284 | 0.0105 | 0.0008 | 0.9603 |
| 535M | Non-breeder | 3.1 | 0.8011 | 644 | 0.348 | 0.0223 | 0.0096 | 0.0006 | 0.9675 |
| 538M | Non-breeder | 6.1 | 0.8    | 735 | 0.43  | 0.0242 | 0.0109 | 0.0004 | 0.9645 |
| 539F | Non-breeder | 3.9 | 0.774  | 658 | 0.354 | 0.0262 | 0.0107 | 0.0004 | 0.9627 |
| 542F | Non-breeder | 3.0 | 0.7985 | 674 | 0.4   | 0.0259 | 0.01   | 0.0004 | 0.9636 |
| 543M | Non-breeder | 2.6 | 0.8029 | 764 | 0.392 | 0.0256 | 0.0101 | 0.0005 | 0.9637 |
| 544M | Non-breeder | 2.7 | 0.8039 | 635 | 0.436 | 0.0252 | 0.01   | 0.0005 | 0.9644 |
| 546M | Non-breeder | 1.8 | 0.8302 | 762 | 0.433 | 0.0266 | 0.0107 | 0.0006 | 0.9621 |
| 570M | Non-breeder | 1.5 | 0.7947 | 652 | 0.417 | 0.0259 | 0.0103 | 0.0003 | 0.9635 |
| 572F | Non-breeder | 6.1 | 0.7995 | 634 | 0.396 | 0.0268 | 0.0108 | 0.0005 | 0.9619 |
| 577M | Non-breeder | 1.9 | 0.7849 | 692 | 0.342 | 0.0241 | 0.0097 | 0.0006 | 0.9656 |
| 589F | Non-breeder | 2.4 | 0.7977 | 668 | 0.435 | 0.0272 | 0.01   | 0.0004 | 0.9624 |
| 591F | Non-breeder | 2.3 | 0.7913 | 684 | 0.389 | 0.0251 | 0.0115 | 0.0004 | 0.963  |
| 593F | Non-breeder | 1.8 | 0.793  | 633 | 0.397 | 0.0264 | 0.0108 | 0.0007 | 0.9621 |
| 613M | Non-breeder | 2.3 | 0.7918 | 647 | 0.393 | 0.0249 | 0.0106 | 0.0007 | 0.9638 |
| 620M | Non-breeder | 0.6 | 0.7913 | 630 | 0.401 | 0.026  | 0.0113 | 0.0003 | 0.9623 |

|      |             |     |        |     |       |        |        |        |        |
|------|-------------|-----|--------|-----|-------|--------|--------|--------|--------|
| 621F | Non-breeder | 2.6 | 0.791  | 661 | 0.408 | 0.0252 | 0.0102 | 0.0005 | 0.964  |
| 622F | Non-breeder | 0.7 | 0.7624 | 619 | 0.316 | 0.0264 | 0.0111 | 0.0005 | 0.962  |
| 624F | Non-breeder | 1.3 | 0.8167 | 772 | 0.415 | 0.0253 | 0.0111 | 0.0007 | 0.9628 |
| 626F | Non-breeder | 1.4 | 0.8021 | 640 | 0.46  | 0.025  | 0.0105 | 0.0004 | 0.9642 |
| 629M | Non-breeder | 2.3 | 0.7848 | 661 | 0.377 | 0.0251 | 0.0111 | 0.0005 | 0.9633 |
| 630F | Non-breeder | 1.6 | 0.7881 | 648 | 0.397 | 0.0264 | 0.0109 | 0.0005 | 0.9623 |
| 634F | Non-breeder | 1.9 | 0.7769 | 622 | 0.359 | 0.0253 | 0.0109 | 0.0007 | 0.9631 |
| 635F | Non-breeder | 1.8 | 0.7994 | 656 | 0.416 | 0.0258 | 0.0105 | 0.0005 | 0.9632 |
| 638M | Non-breeder | 1.0 | 0.7878 | 638 | 0.398 | 0.0261 | 0.0106 | 0.0007 | 0.9626 |
| 643F | Non-breeder | 1.3 | 0.7868 | 593 | 0.38  | 0.0246 | 0.0109 | 0.0004 | 0.9642 |
| 644F | Non-breeder | 1.5 | 0.7915 | 637 | 0.398 | 0.0278 | 0.0112 | 0.0002 | 0.9609 |
| 645F | Non-breeder | 2.1 | 0.7974 | 734 | 0.4   | 0.0259 | 0.0104 | 0.0007 | 0.963  |
| 646F | Non-breeder | 2.5 | 0.77   | 667 | 0.351 | 0.0244 | 0.0113 | 0.0003 | 0.964  |
| 647M | Non-breeder | 3.9 | 0.7778 | 692 | 0.36  | 0.0263 | 0.0103 | 0.0003 | 0.9631 |
| 658M | Non-breeder | 3.9 | 0.8222 | 707 | 0.349 | 0.0265 | 0.011  | 0.0005 | 0.962  |
| 659M | Non-breeder | 3.9 | 0.8176 | 615 | 0.3   | 0.0266 | 0.0111 | 0.0006 | 0.9617 |
| 660F | Non-breeder | 1.9 | 0.7801 | 642 | 0.365 | 0.0256 | 0.0103 | 0.0007 | 0.9634 |
| 661M | Non-breeder | 8.4 | 0.7925 | 678 | 0.364 | 0.0229 | 0.0106 | 0.0008 | 0.9658 |
| 676M | Non-breeder | 0.3 | 0.7905 | 663 | 0.392 | 0.0254 | 0.0116 | 0.0005 | 0.9626 |
| 679F | Non-breeder | 1.6 | 0.8198 | 710 | 0.353 | 0.0243 | 0.0102 | 0.0007 | 0.9648 |
| 687M | Non-breeder | 1.6 | 0.7849 | 619 | 0.291 | 0.0263 | 0.0099 | 0.0005 | 0.9634 |
| 688M | Non-breeder | 2.0 | 0.8013 | 586 | 0.413 | 0.0271 | 0.0099 | 0.0007 | 0.9624 |
| 690F | Non-breeder | 2.0 | 0.815  | 757 | 0.393 | 0.0258 | 0.0096 | 0.0005 | 0.9641 |

|      |             |     |        |     |       |        |        |        |        |
|------|-------------|-----|--------|-----|-------|--------|--------|--------|--------|
| 697M | Non-breeder | 2.7 | 0.7961 | 712 | 0.408 | 0.0256 | 0.0109 | 0.0005 | 0.963  |
| 713F | Non-breeder | 1.9 | 0.7993 | 609 | 0.405 | 0.0247 | 0.0096 | 0.0003 | 0.9654 |
| 716F | Non-breeder | 4.4 | 0.7952 | 678 | 0.41  | 0.0255 | 0.0102 | 0.0004 | 0.9639 |
| 729M | Non-breeder | 1.1 | 0.7931 | 659 | 0.411 | 0.025  | 0.0098 | 0.0007 | 0.9645 |
| 734M | Non-breeder | 2.6 | 0.8    | 661 | 0.435 | 0.0256 | 0.0096 | 0.0004 | 0.9644 |
| 753F | Non-breeder | 1.3 | 0.7768 | 669 | 0.355 | 0.0258 | 0.0107 | 0.0005 | 0.963  |
| 754M | Non-breeder | 4.6 | 0.7694 | 648 | 0.333 | 0.024  | 0.0112 | 0.0002 | 0.9646 |
| 756F | Non-breeder | 3.8 | 0.7936 | 726 | 0.411 | 0.0263 | 0.0104 | 0.0006 | 0.9627 |
| 758M | Non-breeder | 3.9 | 0.8342 | 734 | 0.484 | 0.0241 | 0.0098 | 0.0002 | 0.9659 |
| 761F | Non-breeder | 2.9 | 0.7954 | 733 | 0.419 | 0.0231 | 0.0099 | 0.0006 | 0.9664 |
| 762M | Non-breeder | 6.3 | 0.8084 | 665 | 0.448 | 0.0265 | 0.0113 | 0.0004 | 0.9618 |
| 763F | Non-breeder | 5.3 | 0.8066 | 664 | 0.447 | 0.0261 | 0.0101 | 0.0005 | 0.9634 |
| 768F | Non-breeder | 0.9 | 0.7862 | 708 | 0.353 | 0.026  | 0.0113 | 0.0003 | 0.9624 |
| 769M | Non-breeder | 1.9 | 0.7708 | 642 | 0.345 | 0.0243 | 0.0113 | 0.0002 | 0.9641 |
| 772U | Non-breeder | 1.0 | 0.794  | 681 | 0.412 | 0.0245 | 0.0106 | 0.0005 | 0.9643 |
| 775M | Non-breeder | 1.7 | 0.7968 | 715 | 0.383 | 0.0258 | 0.0096 | 0.0002 | 0.9644 |
| 777M | Non-breeder | 2.3 | 0.8062 | 740 | 0.418 | 0.0255 | 0.0099 | 0.0003 | 0.9642 |
| 780M | Non-breeder | 0.8 | 0.8156 | 635 | 0.464 | 0.0229 | 0.0118 | 0.0005 | 0.9648 |
| 808F | Non-breeder | 0.4 | 0.8112 | 703 | 0.343 | 0.0264 | 0.0116 | 0.0005 | 0.9615 |
| 809F | Non-breeder | 2.4 | 0.8096 | 643 | 0.462 | 0.026  | 0.0105 | 0.0004 | 0.9631 |
| 810F | Non-breeder | 1.4 | 0.807  | 658 | 0.341 | 0.0278 | 0.0097 | 0.0006 | 0.9619 |
| 811F | Non-breeder | 1.5 | 0.8175 | 763 | 0.426 | 0.0241 | 0.0089 | 0.0005 | 0.9664 |
| 812M | Non-breeder | 2.5 | 0.7777 | 698 | 0.356 | 0.0258 | 0.0102 | 0.0003 | 0.9637 |

|      |             |     |        |     |       |        |        |        |        |
|------|-------------|-----|--------|-----|-------|--------|--------|--------|--------|
| 813F | Non-breeder | 0.7 | 0.783  | 654 | 0.385 | 0.0258 | 0.0112 | 0.0004 | 0.9626 |
| 818F | Non-breeder | 1.0 | 0.8299 | 684 | 0.495 | 0.0253 | 0.0101 | 0.0005 | 0.9641 |
| 819F | Non-breeder | 2.0 | 0.8143 | 600 | 0.475 | 0.0249 | 0.0106 | 0.0005 | 0.964  |
| 822F | Non-breeder | 3.3 | 0.8252 | 658 | 0.491 | 0.0255 | 0.0101 | 0.0007 | 0.9637 |
| 823F | Non-breeder | 1.6 | 0.7738 | 680 | 0.335 | 0.0258 | 0.0112 | 0.0003 | 0.9627 |
| 824M | Non-breeder | 1.5 | 0.7938 | 708 | 0.359 | 0.0246 | 0.0108 | 0.0007 | 0.9639 |
| 825F | Non-breeder | 1.7 | 0.8367 | 752 | 0.464 | 0.0257 | 0.0103 | 0.0004 | 0.9636 |
| 826F | Non-breeder | 1.1 | 0.8416 | 582 | 0.543 | 0.0259 | 0.01   | 0.0007 | 0.9634 |
| 827M | Non-breeder | 2.0 | 0.8149 | 585 | 0.434 | 0.0267 | 0.0104 | 0.0003 | 0.9626 |
| 828M | Non-breeder | 1.9 | 0.7992 | 583 | 0.411 | 0.0253 | 0.0109 | 0.0006 | 0.9633 |
| 829F | Non-breeder | 1.5 | 0.7989 | 620 | 0.429 | 0.0249 | 0.0099 | 0.0007 | 0.9645 |
| 830F | Non-breeder | 2.9 | 0.7829 | 679 | 0.376 | 0.0238 | 0.01   | 0.0004 | 0.9659 |
| 831F | Non-breeder | 2.1 | 0.7994 | 713 | 0.422 | 0.0249 | 0.0109 | 0.0006 | 0.9636 |
| 869M | Non-breeder | 2.0 | 0.8143 | 617 | 0.448 | 0.0254 | 0.0101 | 0.0005 | 0.964  |
| 872F | Non-breeder | 2.9 | 0.8116 | 600 | 0.438 | 0.0236 | 0.0117 | 0.0007 | 0.964  |
| 905M | Non-breeder | 3.6 | 0.8112 | 496 | 0.203 | 0.0277 | 0.0105 | 0.0001 | 0.9617 |
| 906M | Non-breeder | 1.8 | 0.7988 | 617 | 0.411 | 0.0263 | 0.0115 | 0.0005 | 0.9617 |
| 908F | Non-breeder | 0.8 | 0.8028 | 746 | 0.43  | 0.0262 | 0.0109 | 0.0004 | 0.9625 |
| 924F | Non-breeder | 0.8 | 0.7871 | 704 | 0.394 | 0.0251 | 0.011  | 0.0005 | 0.9635 |
| 961M | Non-breeder | 0.6 | 0.7726 | 638 | 0.381 | 0.0241 | 0.0114 | 0.0004 | 0.9642 |
| 964M | Non-breeder | 3.7 | 0.7923 | 674 | 0.415 | 0.0254 | 0.011  | 0.0005 | 0.9631 |
| 967M | Non-breeder | 1.5 | 0.7831 | 684 | 0.342 | 0.023  | 0.0112 | 0.0005 | 0.9653 |
| 968F | Non-breeder | 1.6 | 0.7825 | 650 | 0.392 | 0.026  | 0.01   | 0.0005 | 0.9635 |



|      |             |     |        |     |       |        |        |        |        |
|------|-------------|-----|--------|-----|-------|--------|--------|--------|--------|
| 977F | Non-breeder | 2.8 | 0.7963 | 649 | 0.429 | 0.0267 | 0.0099 | 0.0007 | 0.9627 |
| 979F | Non-breeder | 1.5 | 0.8007 | 647 | 0.308 | 0.0253 | 0.0115 | 0.0007 | 0.9625 |
| 993M | Non-breeder | 3.2 | 0.7955 | 707 | 0.433 | 0.0244 | 0.0114 | 0.0007 | 0.9635 |
| 994M | Non-breeder | 1.6 | 0.7715 | 655 | 0.369 | 0.0256 | 0.0115 | 0.0004 | 0.9625 |
| 995F | Non-breeder | 1.9 | 0.7891 | 677 | 0.404 | 0.0267 | 0.0104 | 0.0006 | 0.9623 |
| 996M | Non-breeder | 2.8 | 0.7978 | 684 | 0.424 | 0.0242 | 0.0114 | 0.0003 | 0.964  |
| 239M | Unknown     |     | 0.7807 | 679 | 0.363 |        |        |        |        |
| 240M | Unknown     |     | 0.8124 | 731 | 0.402 | 0.0256 | 0.0108 | 0.0006 | 0.963  |
| 285M | Unknown     |     | 0.8076 | 693 | 0.397 | 0.0255 | 0.01   | 0.0004 | 0.9642 |
| 434F | Unknown     | 3.3 | 0.7946 | 713 | 0.39  | 0.0259 | 0.0104 | 0.0004 | 0.9633 |

873  
874  
875
